# Supplementary material for: Mono- and biallelic variant effects on disease at biobank scale
Source: Springer Nature journal article supplement (doi:10.1038/s41586-022-05420-7), 2023-01-18
Supplement: MOESM1 [file 41586_2022_5420_MOESM1_ESM.pdf]

---

**Supplementary information**

---

**Mono- and biallelic variant effects on disease  
at biobank scale**

---

In the format provided by the  
authors and unedited

**Supplementary Information**

**Table of Contents**

**SUPPLEMENTARY INFORMATION ..... 1**

**SUPPLEMENTARY FIGURES ..... 2**

**SUPPLEMENTARY TABLES..... 3**

**SUPPLEMENTARY NOTES. .... 11**

**REFERENCES ..... 19**

**FINNGEN MEMBERS..... 21**

## Supplementary Figures

**Supplementary Figures S1.** Separate pdf. Longitudinal survival curves showing disease onset of homozygous, heterozygous and wildtypes of variants with recessive associations in FinnGen.

**Supplementary Figures S2.** Separate pdf. Longitudinal survival curves showing disease onset of homozygous, heterozygous and wildtypes of known likely pathogenic or conflicting disease variants.

## Supplementary Tables

### *Glossary column names in Supplementary Tables*

phenotype, disease endpoint name

variant, chr:pos:ref:alt

chr, chromosome,

pos, position in GRCH38

ref, reference allele

alt, alternate allele

rsid, rsid

INFO, overall genotype imputation INFO score

AF, allele frequency in FinnGen data

**AN, total allele number in FinnGen data**

AC\_Hom, allele count in individuals homozygous for the alternate allele in FinnGen

enrichment\_nfsee, AF in Finns/ AF in NFSEE (Non-Finnish-non-Swedish-non-Estonian)

grch37\_locus, position in GRCH37

cs, included in credible set after fine-mapping (additive model, method: SuSiE)

pip, posterior inclusion probability after fine-mapping (method: SuSiE)

add\_pval, SAIGE p-value (additive model)

rec\_pval, SAIGE p-value (recessive model)

beta, SAIGE beta (log OR scale)

sebeta, SAIGE beta standard error

top\_associated\_phenotype\_add, most significantly associated phenotype (additive model)

top\_associated\_phenotype\_rec, most significantly associated phenotype (recessive model)

top\_add\_pval, p-value of most significant association (additive model)

top\_rec\_pval, p-value of most significant association (recessive model)

variant\_category, gnomAD variant category

gene, gene from VEP (Variant Effect Predictor) annotation to which most severe consequence applies

R6, FinnGen data release 6 (n=234,553)

R4, FinnGen data release 4 (n=176,899))

ClinVar: Category, category grouped according to 'ClinVar\_ReviewStatus'

ClinVar: Review, 'ClinVar\_ReviewStatus' as given originally in ClinVar  
Mode of inheritance (OMIM), Mode of inheritance annotated from OMIM for this gene  
(‘both’: both dominant and recessive inheritance modes annotated)

**Supplementary Table S1.** Any coding variant association that has a p-value  $< 10^{-7}$  in the additive model or a p-value  $< 10^{-7}$  in the recessive model (all available disease endpoints).

**Supplementary Table S2. (A more detailed version of Table 1.)** Recessive associations. Only the most significant variant is shown per locus. mis, missense; pLoF, probable loss-of-function; hom, homozygotes in FinnGen; R6, FinnGen data release 6 (n=234,553); UKBB, UK biobank (n=420,531).

**Supplementary Table S3.** Summary statistics of coding variants with any recessive association, i.e. recessive p-value  $< 10^{-7}$  and recessive p-value two orders of magnitude below additive p-value (all available disease endpoints, associations with p-value  $< 0.01$ ).

**Supplementary Table S4.** Simulation results of genotype and phenotype data to assess the output of our recessive and additive model in the presence of a strictly recessive or additive association.

**Supplementary Table S5. Variants with recessive associations in FinnGen that overlap known GWAS hits.** Adjacent variants with  $r^2 > 0.25$  associated with the same trait or same parent trait are considered as one locus and only the most significant variant shown per locus. The first five columns show gene, rsid, associated phenotype, recessive p-value and beta in FinnGen. Columns six to eight give the known GWAS phenotypes, SNPs and p-values. LD ( $r^2 \geq 0.1$ ) of the known GWAS SNPs to respective SNPs in FinnGen is given in the last column. FinnGen, FG.

The six large homozygous effects in Supplementary Table 3 that we thus better captured with a recessive GWAS model have been previously mentioned for two out of the six variants: Homozygosity of rs601338 in *FUT2* has been shown to protect from intestinal infection<sup>1</sup>. Homozygosity of rs689 in *INS* had a significantly stronger effect on Type 1 Diabetes than in heterozygotes<sup>2</sup> and was previously associated with age-at-diagnosis of Type 1 Diabetes (P-value = 0.001), with homozygosity for the protective T allele delaying the onset of Type 1 Diabetes by approximately 2 years in these families<sup>3</sup>. (In our results, the direction of effect is the same, however the reference and alternative allele are swapped, see also Table 2 in the manuscript.)

| Gene           | rsid       | Lead Phenotype FG                                  | p-value FG | beta FG | known GWAS ... phenotype in LD                                  | ... SNP              | ... r2   | ... p-value                               |
|----------------|------------|----------------------------------------------------|------------|---------|-----------------------------------------------------------------|----------------------|----------|-------------------------------------------|
| <i>UGT1A6</i>  | rs1105879  | Cholelithiasis                                     | 4.10E-11   | 0.09    | Gallstone disease; Serum bilirubin levels in metabolic syndrome | rs2070959; rs2070959 | 0.8; 0.8 | 9x10 <sup>-11</sup> ; 2x10 <sup>-14</sup> |
| <i>IGHG3</i>   | rs74093865 | Immunodeficiency w. predominantly antibody defects | 4.40E-08   | 0.5     | Composite immunoglobulin trait (IgG/IgM)                        | rs74093831           | 0.72     | 8x10 <sup>-9</sup>                        |
| <i>FUT2</i>    | rs601338   | Intestinal infectious diseases                     | 4.00E-09   | -0.07   | Number of common colds; Vitamin B12 levels                      | rs601338; rs492602   | 1; 0.99  | 4x10 <sup>-7</sup> ; 5x10 <sup>-17</sup>  |
| <i>TMEM214</i> | rs1124649  | Pain (limb, back, neck, head abdominally)          | 3.80E-11   | -0.06   | CRP level; polymyalgia rheumatica                               | rs11681145           | 0.78; 1  | 9x10 <sup>-12</sup> ; 0.004               |
| <i>INS</i>     | rs3842753  | Type 1 diabetes                                    | 1.20E-41   | 0.24    | Type 1 diabetes                                                 | rs689                | 0.99     | 5x10 <sup>-196</sup>                      |
| <i>SLCO1A2</i> | rs10841795 | Cardiac murmurs and other cardiac sounds           | 1.40E-08   | 1       | Blood metabolite levels                                         | rs12829704           | 0.6      | 9x10 <sup>-21</sup>                       |

**Supplementary Table S6 Variants with recessive associations in FinnGen that could be tested for replication in the UK biobank<sup>4</sup>.** The last three rows colored in brown/grey show recessive associations of different coding variants in the UK biobank than the coding variant with a genomewide significant hit in FinnGen. UK biobank, UKB; FinnGen, FG; MAF, minor allele frequency.

| Gene            | rsid        | Phenotype FinnGen                                    | Phenotype UKBB                                            | MAF FG | MAF NFE gnom AD | p-value FG | beta FG | p-value UKB | beta UKB |
|-----------------|-------------|------------------------------------------------------|-----------------------------------------------------------|--------|-----------------|------------|---------|-------------|----------|
| <i>APPL2</i>    | rs138491961 | noninflammatory disorders of uterus, except cervix   | N85 noninflammatory disorders of uterus, except cervix    | 0.0032 | 0.0015          | 3.69E-08   | 5.54    | NA          | NA       |
| <i>CEP250</i>   | rs56259282  | Varicose veins                                       | I83 Varicose veins of lower extremities                   | 0.0046 | 0.012           | 1.27E-08   | 4.33    | 0.027       | 1.97     |
| <i>C10orf90</i> | rs139123090 | Conductive and sensorineural hearing loss            | H90 Conductive and sensorineural hearing loss             | 0.0085 | 0.0045          | 2.25E-12   | 5.96    | 0.00012     | 56.7     |
| <i>PCK1</i>     | rs201186470 | Glucose regulation and pancreatic secretion          | E16 Other disorders of pancreatic internal secretion      | 0.011  | 0.00045         | 4.65E-08   | 9.77    | NA          | NA       |
| <i>GJB2</i>     | rs398123814 | Sensorineural hearing loss                           | H90 Conductive and sensorineural hearing loss             | 0.012  | 0.0092          | 2.86E-28   | 6.49    | 3.11E-08    | 82.0     |
| <i>C15orf40</i> | rs115868366 | Demyelinating diseases of the central nervous system | Multiple sclerosis                                        | 0.013  | 0.018           | 3.94E-08   | 11.3    | 0.058       | 2.53     |
| <i>CASP7</i>    | rs141266925 | Other cataract                                       | H26 Other cataract                                        | 0.015  | 0.0035          | 2.47E-16   | 4.77    | NA          | NA       |
| <i>EBAG9</i>    | rs1422      | Female infertility                                   | N97 Female infertility                                    | 0.056  | 0.041           | 1.60E-11   | 2.0     | 0.0018      | 3.90     |
| <i>SERPINA1</i> | rs28929474  | Emphysema                                            | J43 Emphysema                                             | 0.02   | 0.018           | 2.16E-21   | 28.0    | 1.43E-26    | 20.6     |
| <i>INS</i>      | rs3842753   | Type 1 diabetes                                      | Type 1 diabetes                                           | 0.79   | 0.72            | 5.71E-46   | 0.28    | 6.31E-23    | 0.35     |
| <i>IGHG3</i>    | rs74093865  | Immunodeficiency w. predominantly antibody defects   | D80 Immunodeficiency w. predominantly antibody defects    | 0.4    | 0.3             | 4.44E-08   | 0.50    | 0.027       | 0.53     |
| <i>UGT1A6</i>   | rs1105879   | Cholelithiasis, broad definition with cholecystitis  | Cholelithiasis and cholecystitis                          | 0.45   | 0.35            | 1.53E-11   | 0.08    | 1.58E-10    | 0.16     |
| <i>SLCO1A2</i>  | rs10841795  | Cardiac murmurs and other cardiac sounds             | R01 Cardiac murmurs and other cardiac sounds              | 0.11   | 0.14            | 1.38E-08   | 1.03    | 0.47        | 0.14     |
| <i>TMEM214</i>  | rs1124649   | Pain (limb, back, neck, head abdominally)            | General pain for 3+ months                                | 0.28   | 0.31            | 3.79E-11   | -0.06   | 0.41        | -0.10    |
| <i>ZNF415</i>   | rs10410030  | Mild mental retardation                              | F81 Specific developmental disorders of scholastic skills | 0.097  | 0.15            | 1.56E-08   | 2.10    | 0.42        | -0.37    |
| <i>FUT2</i>     | rs601338    | Intestinal infectious diseases                       | Intestinal infection                                      | 0.37   | 0.48            | 4.01E-09   | -0.07   | 0.21        | -0.03    |
| <i>CASP7</i>    | rs2227309   | Other cataract                                       | H26 Other cataract                                        | 0.28   | 0.26            | NA         | NA      | 0.016       | 0.07     |
| <i>APPL2</i>    | rs2272495   | noninflammatory disorders of uterus, except cervix   | N85 noninflammatory disorders of uterus, except cervix    | 0.23   | 0.20            | NA         | NA      | 0.0085      | 0.18     |
| <i>PCK1</i>     | rs1804160   | Glucose regulation and pancreatic secretion          | E16 Other disorders of pancreatic internal secretion      | 0.043  | 0.023           | NA         | NA      | 0.038       | 1.67     |

**Supplementary Table S7. Variants with recessive associations in FinnGen that could be tested for additive associations in the UK biobank (UKBB)<sup>4</sup>.** The columns show gene, rsid, phenotype name in UKBB, additive p-value and beta in UKBB and the phenotype name in FinnGen.

| Gene     | rsid        | Phenotype UKBB                                     | p-value  | beta  | Phenotype FinnGen                                            |
|----------|-------------|----------------------------------------------------|----------|-------|--------------------------------------------------------------|
| ACOXL    | rs80265967  | Gestational diabetes                               | >0.05    | NA    | Diabetes mellitus in pregnancy                               |
| APPL2    | rs138491961 | noninflammatory disorders of uterus, except cervix | >0.05    | NA    | N85 Other noninflammatory disorders of uterus, except cervix |
| CASP7    | rs141266925 | Cataract                                           | 4.50E-12 | 0.7   | Cataract                                                     |
| C10orf90 | rs139123090 | Conductive and sensorineural hearing loss          | >0.05    | NA    | Conductive and sensorineural hearing loss                    |
| C15orf40 | rs115868366 | Demyelinating diseases of the CNS                  | 1.40E-02 | 0.34  | multiple sclerosis                                           |
| CEP250   | rs56259282  | Varicose veins                                     | >0.05    | NA    | Varicose veins                                               |
| CLCN1    | rs55960271  | Diseases of the myoneural junction and muscle      | >0.05    | NA    | Myasthenia gravis and other myoneural disorders              |
| CNGB1    | rs201162411 | Hereditary retinal dystrophy                       | >0.05    | NA    | Hereditary retinal dystrophy                                 |
| DMBT1    | rs189221852 | Nephropathy                                        | 2.20E-04 | 5.3   | Non-proliferative glomerulonephritis                         |
| EBAG9    | rs1422      | Female infertility                                 | >0.05    | NA    | Female infertility                                           |
| IGHG3    | rs74093865  | Immunodeficiency w. predominantly antibody defects | >0.05    | NA    | Immunodeficiency with predominantly antibody defects         |
| INS      | rs3842753   | Type 1 diabetes                                    | 9.10E-20 | 0.28  | Type 1 diabetes                                              |
| PCK1     | rs1804160   | Other disorders of pancreatic internal secretion   | >0.05    | NA    | Glucose regulation and pancreatic secretion                  |
| PLTP     | rs56126980  | Unspecified lump in breast                         | >0.05    | NA    | Lump or mass in breast                                       |
| SERPINA1 | rs28929474  | Emphysema                                          | 2.30E-19 | 1.3   | Emphysema                                                    |
| SLCO1A2  | rs10841795  | Cardiac murmurs and other cardiac sounds           | >0.05    | NA    | Cardiac murmurs and other cardiac sounds                     |
| TMEM214  | rs1124649   | Pain (limb, back, neck, head abdominally)          | 4.00E-03 | -0.13 | polymyalgia rheumatica                                       |
| UGT1A6   | rs200711686 | Cholelithiasis                                     | 1.40E-06 | 0.064 | Cholelithiasis                                               |
| USP5     | rs200723728 | Endometriosis of ovary                             | >0.05    | NA    | Endometriosis                                                |
| USP8     | rs147742292 | Postpartum haemorrhage                             | >0.05    | NA    | Postpartum haemorrhage                                       |
| ZNF415   | rs10410030  | Mild mental retardation                            | 2.90E-02 | 0.31  | Mild cognitive impairment                                    |



**Supplementary Table S8.** Most significant disease associations of all 15140 coding variants annotated in ClinVar.

**Supplementary Table S9. Likely benign ClinVar variants that are the most likely causative (top PIP) variant in one GWAS locus.** Genomic locations are given as rsids and GRCh38 coordinates (chromosome, position in bp, reference and alternate allele, separated by “:”). PIP, posterior inclusion probability (statistical finemapping<sup>5</sup>); AF, allele frequency in FinnGen; AD, autosomal dominant; AR autosomal recessive; KELA, Finnish Social Insurance Institution. All listed variants are missense variants.

| Gene  | GRCh38               | rsid            | AF        | OMIM phenotype of gene                                                | GWAS phenotype in FinnGen               | beta  | p-value   | PIP  |
|-------|----------------------|-----------------|-----------|-----------------------------------------------------------------------|-----------------------------------------|-------|-----------|------|
| ARMS2 | 10:122454<br>932:G:T | rs10490<br>924  | 0.24      | Age-related macular degeneration (association)                        | Age-related mac. degen.                 | 1.06  | 1.90E-104 | 0.08 |
|       |                      |                 |           |                                                                       | Other retinal disorders                 | 0.27  | 1.78E-46  | 0.08 |
|       |                      |                 |           |                                                                       | Diabetic retinopathy                    | 0.16  | 3.92E-22  | 0.08 |
| ATM   | 11:108272<br>729:C:G | rs18000<br>57   | 0.01      | Ataxia-telangiectasia AR;<br>Breast cancer susceptibility             | Malignant neoplasm                      | 0.28  | 2.58E-08  | 0.4  |
| INS   | 11:215983<br>0:T:G   | rs38427<br>53   | 0.79      | Diabetes m. (neonatal, AR,<br>AD, MODY)                               | Leiomyoma of uterus                     | 0.45  | 1.13E-09  | 0.22 |
|       |                      |                 |           |                                                                       | Diabetic maculopathy                    | 0.32  | 1.04E-10  | 0.44 |
| HNF1A | 12:120978<br>847:A:C | rs11692<br>88   | 0.37      | Diabetes m. (AR, AD MODY)                                             | Diabetic retinopathy                    | 0.32  | 5.55E-19  | 0.51 |
|       |                      |                 |           |                                                                       | Statin medication                       | 0.08  | 1.55E-14  | 0.86 |
| KRT5  | 12:525198<br>84:C:T  | rs11170<br>164  | 0.1       | Epidermolysis bullosa simplex,<br>AR, AD                              | Malignant neoplasm of skin              | 0.21  | 1.34E-12  | 0.94 |
| RPL3L | 16:194706<br>3:G:A   | rs14797<br>2626 | 0.01      | Cardiomyopathy, dilated, AR                                           | Atrial fibrillation and flutter         | 0.45  | 6.23E-11  | 0.49 |
| TYK2  | 19:103524<br>42:G:C  | rs34536<br>443  | 0.03      | Immunodeficiency, AR                                                  | KELA Reimbursement (Gastrointestinal)   | -0.3  | 6.09E-09  | 0.7  |
| CFH   | 1:1966901<br>07:C:T  | rs10611<br>70   | 0.56      | Complement factor H deficiency, AR, AD;<br>Macular deg. (association) | Disorders of choroid and retina         | -0.11 | 5.18E-16  | 0.02 |
|       |                      |                 |           |                                                                       | Diabetic retinopathy                    | -0.09 | 2.05E-10  | 0.02 |
| PCSK9 | 1:5503997<br>4:G:T   | rs11591<br>147  | 0.04      | Hypercholesterolemia, familial,<br>AD                                 | Hypercholesterolaemia                   | -0.43 | 1.33E-16  | 1    |
|       |                      |                 |           |                                                                       | Coronary atherosclerosis                | -0.22 | 4.59E-09  | 0.41 |
|       |                      |                 |           |                                                                       | Myocardial infarction                   | -0.32 | 1.48E-11  | 0.94 |
|       |                      |                 |           |                                                                       | Coronary revascular.                    | -0.36 | 1.10E-12  | 0.93 |
|       |                      |                 |           |                                                                       | Statin medication                       | -0.61 | 5.26E-119 | 1    |
| HNF4A | 20:444137<br>24:C:T  | rs18009<br>61   | 0.05      | MODY, type I, AD                                                      | Cholelithiasis                          | 0.38  | 1.27E-30  | 1    |
| AIRE  | 21:442944<br>11:C:T  | rs74203<br>920  | 0.04      | Autoimm. polyendocrinopathy syndrome AR, AD                           | Intrahepatic Cholestasis of Pregnancy   | 0.82  | 2.43E-09  | 1    |
|       |                      |                 |           |                                                                       | Diabetic maculopathy                    | 0.64  | 2.39E-09  | 0.99 |
|       |                      |                 |           |                                                                       | Type 1 diabetes                         | 0.38  | 2.19E-10  | 0.96 |
| IFIH1 | 2:1622675<br>41:C:T  | rs19907<br>60   | 0.58      | Aicardi-Goutieres AD;<br>Singleton-Merten, AD                         | Diabetic retinopathy                    | 0.48  | 9.48E-11  | 1    |
|       |                      |                 |           |                                                                       | Hypothyroidism                          | 0.08  | 8.88E-11  | 0.62 |
|       |                      |                 |           |                                                                       | Disorders of the thyroid gland          | 0.07  | 5.43E-09  | 0.51 |
| APOB  | 2:2104102<br>8:G:A   | rs13671<br>17   | 0.28      | Hypercholesterolemia AD<br>Hypobetalipoproteinemia, AR                | Disorders of lipoprotein metabolism     | 0.11  | 6.64E-12  | 0.51 |
| ZAP70 | 2:9772515<br>3:C:T   | rs14595<br>5907 | 0.01<br>9 | Autoimmune disease, infantile, AR                                     | Hypothyroidism                          | 0.24  | 1.83E-08  | 0.43 |
| LRBA  | 4:1502779<br>28:G:A  | rs22908<br>46   | 0.22      | Immunodeficiency, with autoimmunity, AR                               | Cholelithiasis                          | 0.12  | 1.31E-13  | 0.52 |
|       |                      |                 |           |                                                                       | Disorders of biliary tract and pancreas | 0.1   | 2.19E-12  | 0.7  |
| DBH   | 9:1336366<br>06:C:T  | rs77273<br>740  | 0.05      | Orthostatic hypotension due to DBH deficiency, AR                     | Hypertensive diseases                   | -0.16 | 6.16E-13  | 0.99 |

**Supplementary Table S10.** Summary statistics of all coding variants in FinnGen release 4 (any additive association with p-value  $<1 \times 10^{-4}$ ).

## Supplementary Notes.

**1) Variants causing disease with recessive inheritance are at higher MAF in Finnish than Non-Finnish Europeans.** In light of a global enrichment of deleterious variants in Finland<sup>6,7</sup> and the well-described “Finnish Disease Heritage”<sup>8,9</sup>, we hypothesized that a set of known disease-causing variants should exist at higher frequencies in Finland. We thus compared minor allele frequencies (MAF) of 2419 unique variants that were listed in the disease variant database ClinVar<sup>10</sup> (version 2018) as pathogenic or likely pathogenic (likely pathogenic) in genes with only recessive inheritance annotated in the Online Mendelian Inheritance in Man, OMIM® (omim.org) between 10,824 Finnish (FIN) and 10,824 Non-Finnish Europeans (NFE) taken from the gnomAD population database<sup>11</sup> (Supplementary Figure S1). Concordant with a known lower rare variant diversity<sup>9</sup>, only 554 likely pathogenic variants were present in FIN while 2169 were present in NFE at same sample sizes. As expected, however, observed likely pathogenic variants were at higher MAF in FIN (median MAF  $9.2 \times 10^{-5}$ ) than NFE (median MAF =  $4.7 \times 10^{-5}$ , p-value =  $6 \times 10^{-7}$ , Wilcoxon rank test), with the difference particularly pronounced in 133 variants in Finnish disease heritage genes<sup>8</sup> (see Supplementary Figure S1). In FIN, 12% (67/554) of likely pathogenic variants were above MAF 0.001 (39% [217/554] above MAF  $10^{-4}$ ) compared to 2.5% (54/2169) in NFE (26% [559/2169] above MAF  $10^{-4}$ ).

**2) Simulations of recessive and additive associations.** We performed simulations of genotype and phenotype data to assess the output of our recessive and additive model in the presence of a strictly recessive or additive association. We simulated genotype and phenotype data aiming to resemble our own data. Specifically, we generated genotype counts of wildtype, heterozygotes and mutant homozygotes in 200,000 individuals of a variant at four different MAF thresholds following Hardy Weinberg Equilibrium (using R library HardyWeinberg<sup>12</sup>). We then generated random phenotype data of cases versus controls of a disease with a prevalence of 0.05 using the rbinom function in base R. We tested a recessive and an additive scenario. For the recessive scenario, we set the probability of homozygotes to develop the disease to 5x compared to wildtype and set heterozygote effect sizes to 1 corresponding to no heterozygous effect. For the additive scenario, we set the heterozygote effect to 1.5 and homozygous effect to 2.25 corresponding to a strictly additive effect on a logarithmic scale. We then performed logistic regression using the glm function in R with an additive and a recessive model, respectively.

For visualization and a table of results please see Extended Data Figure 2 and Supplementary Table S4. In summary, we find that if a simulated recessive effect reaches genomewide significance in the recessive model (recessive p-value  $<5 \times 10^{-8}$ ), the recessive p-value is 2 orders of magnitude below the additive p-value in 298,414/298,418 instances across 4x100,000 simulations. Thus, if truly recessive associations reach genomewide significance, we will likely identify them as recessive with our approach. Conversely, we find that for a simulated strictly additive effect in logarithmic space (heterozygous effect 1.5, homozygous effect 2.25; 100,000 simulations each at minor allele frequency thresholds 0.01, 0.02, 0.05, 0.1) recessive p-value is 2 orders of magnitude below the additive p-value in 0/400,000 simulations. We can thus with high confidence reject strict additivity when recessive p-value is 2 orders of magnitude below the additive p-value.

In an earlier version of this manuscript, we found in additional simulations that for increasing sizes of heterozygous effects the additive model's significance increased accordingly<sup>13</sup>. We found similar results for varying effect sizes and MAF.

**3) Novel recessive disease associations.** Here, we highlight two variants with large homozygous effects in genes with no previous disease associations, in *CASP7* associated with cataract, *C10orf90* associated with hearing loss and *EBAG9* associated with female infertility.

We would first like to present a missense variant in *CASP7* with a MAF of 0.015 in Finland (4x enriched in Finns) that we found associated with adult-onset cataract. The variant had large homozygous effects on the distinct phenotypes “other cataract” (p-value =  $2 \times 10^{-16}$ , beta 4.8, most frequent ICD10 codes in 43 homozygotes: 13x secondary cataract and 7x presenile cataract) and “senile cataract” (p-value =  $2 \times 10^{-12}$ , beta 2.1). While there were too few homozygotes in the UKBB we could replicate a genomewide significant effect on phenotype “all cataracts” in the additive model in UKBB (p-value =  $5 \times 10^{-12}$ , beta 0.7) suggesting a potential heterozygous effect or homozygous effect of other variants in LD. There was also some evidence for an effect on “other cataracts” in heterozygous carriers in FinnGen (SAiGE GWAS p-value 0.003, beta 0.25). Age at first diagnosis was nominally significantly earlier in homozygotes (see Supplementary Figure 5). In the age group below 63 (mean retirement age in Finland) 50% of homozygotes (13/26) but only 3.4% (94/2750) of heterozygous and 3.1% (2710/87799) of wildtype carriers had already reported cataracts in our data. *CASP7* encodes Caspase-7, an executing enzyme in apoptosis (programmed cell death)<sup>14</sup>. In lens development, cell organelles are degraded to create transparent cells by a process very similar to

apoptosis. Further, deactivating apoptosis genes in mice (e.g. *Casp3*<sup>15</sup> or *Apaf-1* and *p53*<sup>16</sup>) has been shown to lead to cataract and there has been evidence for apoptosis involved in human non-congenital cataract<sup>17,18</sup>. *CASP7* is therefore a biologically plausible and to the best of our knowledge first Mendelian gene for adult-onset cataract, the leading cause of vision loss worldwide with no other effective treatment than surgery and therefore particularly affecting low/middle income countries (Source: WHO, 2012).

The missense variant in *C10orf90* was associated with sensorineural hearing loss also with Mendelian effects (recessive p-value =  $5 \times 10^{-12}$ , beta 6.0; additive p-value  $> 10^{-4}$ ), which we could replicate in the UKBB (recessive p-value  $1 \times 10^{-4}$ , beta 56). The variant was 2.8x enriched in Finns with a MAF of 0.0083 in Finland. Homozygous carriers had significantly earlier onset of diseases: among 14k individuals diagnosed with hearing loss carriers of homozygous variants in *C10orf90* were first diagnosed at a mean age of  $40 \pm 17$  (mean $\pm$ sd) compared to wildtype carriers ( $63 \pm 16$ , p-value  $8 \times 10^{-5}$ , Wilcoxon-rank test). There is less known about the gene *C10orf90* which is also called fragile-site associated tumor suppressor (*FATS*)<sup>19</sup>. However, mutations in its most closely related paralog gene *ALMS1* cause the ciliopathy “Alstrom syndrome” with sensorineural hearing loss as one of its main symptoms<sup>20</sup>. As there is also some evidence for a role of *C10orf90* in cilia formation<sup>21</sup>, it is plausible that *C10orf90* would also cause hearing via an effect on cilia. However, since there are no other symptoms in variant carriers beyond expectation apart from hearing loss, this is likely restricted to hearing loss and therefore distinct from *ALMS1*.

Next, we find a noncoding variant in *EBAG9* with a homozygous effect on female infertility. This is the only noncoding variant we investigated in our study but we believe it is the more likely causal candidate than the linked PTV variant in *PKHD1L1* we initially identified as it has a larger effect (beta 2.0 compared to 0.21), it is more likely causal after finemapping (PIP 0.2 while the PTV in *PKHD1L1* is not in the credible set) and *EBAG9* is a known estrogen responsive gene. 48 of 4,505 women (1.1%) with infertility in FinnGen are homozygous for the *EBAG9* variant. In FinnGen R6 data, we investigated the effect of the *EBAG9* variant on fertility in 106,732 women born between 1925 and 1975 for whom we had thus approximately the whole reproductive life span available. We find that 357 homozygotes of the *EBAG9* variant had fewer children ( $1.7 \pm 1.3$  [mean $\pm$ sd], p-value 0.0002, Wilcoxon rank test) than wildtypes ( $2.0 \pm 1.3$ ) and a later age at first child ( $27.2 \pm 5.2$  versus  $28.3 \pm 5.5$ , p-value 0.01, Wilcoxon rank test). This effect is mainly driven by 71 *EBAG9* homozygotes

diagnosed with infertility as it is in the expected direction but not significant in 302 *EBAG9* homozygotes without the infertility diagnosis (mean 1.85 children, p-value 0.08, Wilcoxon rank test). Among all 7,980 women diagnosed with infertility 71 *EBAG9* homozygotes were more severely affected as they had fewer children ( $1.0 \pm 0.9$  [mean $\pm$ sd]) than other women with infertility diagnoses ( $1.5 \pm 1.2$  [mean $\pm$ sd]) p-value 0.005, Wilcoxon rank test) and had their first child significantly later ( $32.3 \pm 4.6$  versus  $30.0 \pm 5.6$ , p-value 0.005, Wilcoxon rank test).

**4) Compound heterozygous effects.** The genes *GJB2* and *EYS* harbored more than one pathogenic variant with significant recessive associations in our data so we sought to explore compound heterozygous (=comp-het) effects. We computed linkage disequilibrium (LD) between those variants with a Finnish population reference panel consisting of 2,244 high-coverage (30x) whole genome sequenced individuals<sup>22</sup>. LD between the two *GJB2* variants ( $r^2=0.002$ ) was negligible but the two *EYS* variants were in strong LD ( $r^2=0.47$ ) so we could not investigate comp-het effects for *EYS*. In *GJB2*, we found early onset sensorineural hearing loss in 100 *GJB2* comp-hets, i.e. individuals with one pathogenic missense and one pLoF *GJB2* variant (p-value  $6 \times 10^{-28}$ , HR 6.1, coxph) that each also had effects in homozygous state. In agreement with the variants' different homozygous effect sizes, the effect of comp-het was in between the homozygous pLoF (HR 15, p-value  $7 \times 10^{-37}$ ) and homozygous missense variants' effect sizes (HR 3.9, p-value  $8 \times 10^{-15}$ ) (see Figure 3C). We also tested the effects of another likely pathogenic missense variant in *GJB2*. LD with the other *GJB2* variants was negligible ( $r^2 \sim 0.00$  with both). That variant was at a much lower MAF of 0.004. Therefore, our dataset included only 3 individuals in homozygous state, 4 in compound heterozygous state with the pLoF *GJB2* variant and 5 in compound heterozygous state with the other missense *GJB2* variant. Combined, all 12 variants were associated with early onset sensorineural hearing loss with similar effect as the other pathogenic variants in *GJB2* (p-value  $3 \times 10^{-12}$ , HR 11.8, coxph). We also investigated comp-het effects in *CERKL* as there was an additional known pathogenic pLoF variant in our data chr2:181656814:C:A (hg38) at low frequency (MAF 0.0019) which was thus not well-powered to reach significance in homozygous state in the pheWAS. When excluding individuals with homozygous and comp-het *CERKL* variants we did not find a heterozygous effect of any of the pathogenic variants on the phenotype of retinal dystrophy anymore suggesting comp-het effects drove the initial nominally significant heterozygous effect.

**5) Known disease causing variants in FinnGen.** We studied 15,140 variants that were annotated in ClinVar<sup>10</sup> in 176,899 Finns in the FinnGen research project. These included 311 coding variants that were annotated as likely pathogenic, 147 of them by multiple submitters or an expert panel (corresponds to ClinVar review status of 2-4 out of 4 possible stars) which we thus describe as being annotated as likely pathogenic with “high confidence”. 298 further variants had “conflicting interpretations of pathogenicity” but were classified as likely pathogenic by at least one submitter. 3.4% of study participants carried at least one of ten high confidence likely pathogenic variant in one of nine genes causing disease with dominant inheritance according to OMIM. For 6 out of the 10 likely pathogenic variants we found expected genomewide significant disease associations (see also Supplementary Table S1) in the genes *FLG* (atopic dermatitis, 2690 and 1050 heterozygotes, respectively), *MYOC* (glaucoma, 1023 heterozygotes), *PALB2* (breast cancer, 512 heterozygotes), *JAK2* (Polycythaemia vera, 194 heterozygotes) and *MYBPC3* (Hypertrophic cardiomyopathy, 116 heterozygotes). Accordingly, we did not find genomewide significant associations for 4 of 10 high confidence likely pathogenic variants of which *CHEK2* was genomewide significant for breast cancer in the later FinnGen datafreeze R6. Variants in *COL5A2*, *G6PD* and *PKD1* were not significant in later releases. For *G6PD* this may be expected as the variant is rare (58 hemizygous males) and functionally predicted to lead to Glucose-6-phosphate dehydrogenase activity of 15 to 25 percent of wildtype (Cappellini 1994, Cappellini 1995, De Vita 1989, Frigerio 1994, Lenzerini 1969, Rattazzi 1969), thus characteristic of a moderate (Class III) deficiency where hemolysis is only triggered by stressors. This rare and moderate effect may thus be underpowered to be detected by our EHR data. For variants in *COL5A2* and *PKD1* we would expect at least nominally significant disease associations in later FinnGen releases, given they contain > 60,000 individuals with joint disorders and >1,000 individuals with cystic kidney disease. The fact that there are only two submitters for the variant in *COL5A2* and one submitter classifying the variant in *PKD1* as VUS in a later ClinVar release adds to the suspicion that they may in fact not be truly disease associated.

All of 0.41% of participants (n=726) carried one of 98 high confidence likely pathogenic variants in homozygous state in one of 86 disease genes with known recessive inheritance, 41.8% were heterozygous carriers. Most frequent homozygous mutants were in the genes *BTBD* (partial biotinidase deficiency, 523 homozygotes), *GJB2* (nonsyndromic sensorineural hearing loss, 113 homozygotes) and *SERPINA1* (Alpha-1-antitrypsin deficiency, 77 homozygotes). We found



expected homozygous phenotype associations of *GJB2* and *SERPINA1* variants with genomewide significance. We were however surprised by the lack of genomewide significant disease associations for the known pathogenic variant [*BTD*:p.(Asp444His)] linked to biotinidase deficiency. *BTD*:p.(Asp444His) has been reported as pathogenic for biotinidase deficiency by 17 submitters in ClinVar and experimentally led to a ~25% reduction in biotinidase activity<sup>23</sup>. Homozygotes for *BTD*:p.(Asp444His) are thus expected to have ca. 50% of normal serum biotinidase activity. As partial biotinidase deficiency is however characterized by 10%-30% of normal serum biotinidase activity<sup>24</sup> the lack of disease associations above chance expectation for *BTD*:p.(Asp444His) homozygotes makes sense. We can thus empirically confirm the experimental hypothesis that the variant should only cause disease when compound heterozygous with a variant leading to near-zero biotinidase activity.

We also demonstrate how our results help to verify disease associations of variants with low sample sizes. One example is a missense variant in *SPINK1* with conflicting interpretations of likely benign (1x), likely pathogenic (8x) and VUS (3x) on ClinVar. In our data, it is the only coding variant, most significant and most likely causal variant (finemapping probability 0.19 in FinnGen datafreeze 8) at the respective locus associated with alcohol-induced acute and chronic pancreatitis as well as acute and chronic pancreatitis more generally with odd's ratios between 2.8-8.5. Its inheritance is best described as semidominant with an additive genotype dosage effect. Another example is a variant in *SOD1* with conflicting interpretations of likely benign (1x), likely pathogenic (5x) and VUS (4x) on ClinVar. In our data, we find a large homozygous effect on motor neuron disease with odd's ratio > 100 while not detecting a heterozygous effect which we can confirm with R6 data in a total of 8 cases. We thus classify inheritance as recessive. We are currently preparing the full list of associations of unclear disease variants for submission to ClinVar. We can thus show that we are well-powered to identify known associations across a wide range of disease phenotypes in our dataset. In addition, it can serve as a resource to verify or falsify previously described disease associations. For verification purposes the statistical finemapping can be additionally helpful to identify associations' causal variants.

**6) Benign and likely benign (likely benign) variants in FinnGen.** We studied effects of variants listed in ClinVar<sup>10</sup> as likely benign. Those are regarded as “not the cause for a patient's disorder” ACMG<sup>25</sup>. However, we found more phenotype associations than expected in likely benign ClinVar variants as a group.

To test whether these might potentially just correlate with actual causal variants in linkage disequilibrium we assessed how often they were included in the 95%-credible set (cs) for a given GWAS locus <sup>5</sup>. We found on the contrary, that 142 likely benign missense variants were slightly more often in the 95%-cs than 307 missense variants not annotated in ClinVar (Fisher's Exact test, p-value 0.05, OR 1.5, 95%-CI 1.0-2.4). 16 represented even the most likely causal variant for a GWAS locus. The ClinVar annotation labeling these variants as likely benign was above average quality (1.6; 7 of the 16 likely benign top causal variants had a one star and 9 of 16 a two-star review status in ClinVar) compared to an average 1.2 stars for all likely benign variants in ClinVar (range: zero to three stars). Thus, poor quality of ClinVar classification as likely benign cannot explain why so many benign variants in our dataset are disease associated.

Expectedly, the disease phenotypes in FinnGen – though often related - are mostly different from the known OMIM phenotypes of the respective genes. Nevertheless, disease associations of likely benign variants may still be counterintuitive as they are often interpreted as generally disease-irrelevant <sup>26,27</sup>. How could we then explain global disease associations for them? Firstly, it is plausible that the frequent diagnostic sequencing and analysis of disease-associated genes with high clinical interest also results in submission of many likely benign variants to ClinVar for those genes. Hypothesizing that genes with many disease-causing variants would therefore also get many ClinVar submissions of likely benign variants, we found indeed a positive correlation of the number of likely pathogenic and likely benign variants per gene in ClinVar ( $r^2$  0.41,  $\rho$  0.07, respective  $p < 10^{-16}$ ). Genes with many disease-causing variants - particularly relevant to human disease - may be more likely involved in additional diseases than disease-irrelevant genes <sup>28</sup>. In line with that we found indeed that likely benign ClinVar missense variants had more significant phenotype associations than missense variants in different genes but that signal disappeared mostly when missense variants were matched to the same genes. In addition, likely benign variants are of significantly higher MAF ( $0.07 \pm 0.12$ , mean, sd) than other ClinVar variants ( $0.01 \pm 0.05$ ) in FinnGen which is expected as MAF is a criterion for labeling a variant as likely benign according to official ACMG guidelines <sup>25</sup>. So we are well-powered to find significant disease associations for likely benign variants, particularly in a bottleneck population like Finland that enriches disease variants to higher frequencies <sup>9</sup>. Of note, when investigating unique ClinVar variants in the 95%-cs, 19 out of 67 likely benign ClinVar variants had protective effects on disease, while only 1 out of 27 ClinVar risk variants (i.e. likely pathogenic, conflicting or risk factor variants) was protective (Fisher's

Exact test, p-value 0.01 OR 10, 95%-CI 1.4-443). While their identified effects are more often protective than for known risk variants the majority of associations increase disease risk also in benign variants! In conclusion, we think it is important to keep in mind that variants labeled as likely benign are not generally neutral and can still contribute to disease.

## References

- 1 Grubb, R. Correlation between Lewis blood group and secretor character in man. *Nature* **162**, 933, doi:10.1038/162933a0 (1948).
- 2 Laine, A. P. *et al.* Two insulin gene single nucleotide polymorphisms associated with type 1 diabetes risk in the Finnish and Swedish populations. *Dis Markers* **23**, 139-145, doi:10.1155/2007/574363 (2007).
- 3 Howson, J. M., Walker, N. M., Smyth, D. J., Todd, J. A. & Type, I. D. G. C. Analysis of 19 genes for association with type I diabetes in the Type I Diabetes Genetics Consortium families. *Genes Immun* **10 Suppl 1**, S74-84, doi:10.1038/gene.2009.96 (2009).
- 4 Bycroft, C. *et al.* The UK Biobank resource with deep phenotyping and genomic data. *Nature* **562**, 203-209, doi:10.1038/s41586-018-0579-z (2018).
- 5 Wang, G., Sarkar, A., Carbonetto, P. & Stephens, M. A simple new approach to variable selection in regression, with application to genetic fine mapping. *Journal of the Royal Statistical Society: Series B (Statistical Methodology)* **82**, 1273-1300, doi:<https://doi.org/10.1111/rssb.12388> (2020).
- 6 Locke, A. E. *et al.* Exome sequencing of Finnish isolates enhances rare-variant association power. *Nature* **572**, 323-328, doi:10.1038/s41586-019-1457-z (2019).
- 7 Lim, E. T. *et al.* Distribution and medical impact of loss-of-function variants in the Finnish founder population. *PLoS Genet* **10**, e1004494, doi:10.1371/journal.pgen.1004494 (2014).
- 8 Polvi, A. *et al.* The Finnish disease heritage database (FinDis) update-a database for the genes mutated in the Finnish disease heritage brought to the next-generation sequencing era. *Hum Mutat* **34**, 1458-1466, doi:10.1002/humu.22389 (2013).
- 9 Peltonen, L., Jalanko, A. & Varilo, T. Molecular genetics of the Finnish disease heritage. *Hum Mol Genet* **8**, 1913-1923, doi:10.1093/hmg/8.10.1913 (1999).
- 10 Landrum, M. J. *et al.* ClinVar: public archive of interpretations of clinically relevant variants. *Nucleic Acids Res* **44**, D862-868, doi:10.1093/nar/gkv1222 (2016).
- 11 Karczewski, K. J. *et al.* The mutational constraint spectrum quantified from variation in 141,456 humans. *Nature* **581**, 434-443, doi:10.1038/s41586-020-2308-7 (2020).
- 12 Graffelman, J. Exploring Diallelic Genetic Markers: The HardyWeinberg Package. *2015* **64**, 23, doi:10.18637/jss.v064.i03 (2015).
- 13 Heyne, H. *et al.* Mono-and bi-allelic effects of coding variants on disease in 176,899 Finns. *medRxiv* (2021).
- 14 Lakhani, S. A. *et al.* Caspases 3 and 7: key mediators of mitochondrial events of apoptosis. *Science* **311**, 847-851, doi:10.1126/science.1115035 (2006).
- 15 Zandy, A. J., Lakhani, S., Zheng, T., Flavell, R. A. & Bassnett, S. Role of the executioner caspases during lens development. *J Biol Chem* **280**, 30263-30272, doi:10.1074/jbc.M504007200 (2005).

- 16 Guo, Z., Yikang, S., Yoshida, H., Mak, T. W. & Zacksenhaus, E. Inactivation of the retinoblastoma tumor suppressor induces apoptosis protease-activating factor-1 dependent and independent apoptotic pathways during embryogenesis. *Cancer Res* **61**, 8395-8400 (2001).
- 17 Li, W. C. *et al.* Lens epithelial cell apoptosis appears to be a common cellular basis for non-congenital cataract development in humans and animals. *J Cell Biol* **130**, 169-181, doi:10.1083/jcb.130.1.169 (1995).
- 18 Yan, Q., Liu, J. P. & Li, D. W. Apoptosis in lens development and pathology. *Differentiation* **74**, 195-211, doi:10.1111/j.1432-0436.2006.00068.x (2006).
- 19 Yan, S. *et al.* FATS is an E2-independent ubiquitin ligase that stabilizes p53 and promotes its activation in response to DNA damage. *Oncogene* **33**, 5424-5433, doi:10.1038/onc.2013.494 (2014).
- 20 Alstrom, C. H., Hallgren, B., Nilsson, L. B. & Asander, H. Retinal degeneration combined with obesity, diabetes mellitus and neurogenous deafness: a specific syndrome (not hitherto described) distinct from the Laurence-Moon-Bardet-Biedl syndrome: a clinical, endocrinological and genetic examination based on a large pedigree. *Acta Psychiatr Neurol Scand Suppl* **129**, 1-35 (1959).
- 21 Knorz, V. J. *et al.* Centriolar association of ALMS1 and likely centrosomal functions of the ALMS motif-containing proteins C10orf90 and KIAA1731. *Mol Biol Cell* **21**, 3617-3629, doi:10.1091/mbc.E10-03-0246 (2010).
- 22 Mitt, M. *et al.* Improved imputation accuracy of rare and low-frequency variants using population-specific high-coverage WGS-based imputation reference panel. *Eur J Hum Genet* **25**, 869-876, doi:10.1038/ejhg.2017.51 (2017).
- 23 Norrgard, K. J. *et al.* Mutation (Q456H) is the most common cause of profound biotinidase deficiency in children ascertained by newborn screening in the United States. *Biochem Mol Med* **61**, 22-27, doi:10.1006/bmme.1997.2597 (1997).
- 24 Wolf, B. Biotinidase Deficiency. *GeneReviews®* **1993-2021** (2000 Mar 24 [Updated 2016 Jun 9]).  
<<https://www.ncbi.nlm.nih.gov/books/NBK1322/>>.
- 25 Richards, S. *et al.* Standards and guidelines for the interpretation of sequence variants: a joint consensus recommendation of the American College of Medical Genetics and Genomics and the Association for Molecular Pathology. *Genet Med* **17**, 405-424, doi:10.1038/gim.2015.30 (2015).
- 26 Lek, M. *et al.* Analysis of protein-coding genetic variation in 60,706 humans. *Nature* **536**, 285-291, doi:10.1038/nature19057 (2016).
- 27 Yang, S. *et al.* Sources of discordance among germ-line variant classifications in ClinVar. *Genet Med* **19**, 1118-1126, doi:10.1038/gim.2017.60 (2017).
- 28 Freund, M. K. *et al.* Phenotype-Specific Enrichment of Mendelian Disorder Genes near GWAS Regions across 62 Complex Traits. *Am J Hum Genet* **103**, 535-552, doi:10.1016/j.ajhg.2018.08.017 (2018).

**FinnGen members**

| Full Name               | Affiliation                                                                                                                                                           | E-mail                                          | Role 1               | Role 2                            |
|-------------------------|-----------------------------------------------------------------------------------------------------------------------------------------------------------------------|-------------------------------------------------|----------------------|-----------------------------------|
| Aamo Palotie            | Institute for Molecular Medicine Finland (FIMM), HLIFE, University of Helsinki, Helsinki, Finland; Broad Institute of MIT and Harvard; Massachusetts General Hospital | aamo.palotie@helsinki.fi                        | Steering Committee   | Steering Committee                |
| Mark Daly               | Institute for Molecular Medicine Finland (FIMM), HLIFE, University of Helsinki, Helsinki, Finland; Broad Institute of MIT and Harvard; Massachusetts General Hospital | mark.daly@helsinki.fi                           | Steering Committee   | Steering Committee                |
| Bridget Riley-Gills     | Abbvie, Chicago, IL, United States                                                                                                                                    | bridget.rileygills@abbvie.com                   | Steering Committee   | Pharmaceutical companies          |
| Howard Jacob            | Abbvie, Chicago, IL, United States                                                                                                                                    | howard.jacob@abbvie.com                         | Steering Committee   | Pharmaceutical companies          |
| Dirk Paul               | Astra Zeneca, Cambridge, United Kingdom                                                                                                                               | dirk.paul@astrazeneca.com                       | Steering Committee   | Pharmaceutical companies          |
| Athena Matakidou        | Astra Zeneca, Cambridge, United Kingdom                                                                                                                               | athena.x.matakidou@gsk.com                      | Steering Committee   | Pharmaceutical companies          |
| Adam Platt              | Astra Zeneca, Cambridge, United Kingdom                                                                                                                               | adam.platt@astrazeneca.com                      | Steering Committee   | Pharmaceutical companies          |
| Heiko Runz              | Biogen, Cambridge, MA, United States                                                                                                                                  | heiko.runz@biogen.com                           | Steering Committee   | Pharmaceutical companies          |
| Sally John              | Biogen, Cambridge, MA, United States                                                                                                                                  | sally.john@biogen.com                           | Steering Committee   | Pharmaceutical companies          |
| George Okafo            | Boehringer Ingelheim, Ingelheim am Rhein, Germany                                                                                                                     | george.okafo@boehringer-ingelheim.com           | Steering Committee   | Pharmaceutical companies          |
| Nathan Lawless          | Boehringer Ingelheim, Ingelheim am Rhein, Germany                                                                                                                     | nathan.lawless@boehringer-ingelheim.com         | Steering Committee   | Pharmaceutical companies          |
| Heli Salminen-Mankonen  | Boehringer Ingelheim, Ingelheim am Rhein, Germany                                                                                                                     | heli.salminen-mankonen@boehringer-ingelheim.com | Steering Committee   | Pharmaceutical companies          |
| Robert Plenge           | Bristol Myers Squibb, New York, NY, United States                                                                                                                     | robert.plenge@bms.com                           | Steering Committee   | Pharmaceutical companies          |
| Joseph Maranville       | Bristol Myers Squibb, New York, NY, United States                                                                                                                     | joseph.maranville@bms.com                       | Steering Committee   | Pharmaceutical companies          |
| Mark McCarthy           | Genentech, San Francisco, CA, United States                                                                                                                           | mccarthy.mark@gene.com                          | Steering Committee   | Pharmaceutical companies          |
| Julie Hunkapiller       | Genentech, San Francisco, CA, United States                                                                                                                           | hunkapiller.julie@gene.com                      | Steering Committee   | Pharmaceutical companies          |
| Margaret G. Ehm         | GlaxoSmithKline, Collegeville, PA, United States                                                                                                                      | meg.g.ehm@gsk.com                               | Steering Committee   | Pharmaceutical companies          |
| Kirsi Auro              | GlaxoSmithKline, Espoo, Finland                                                                                                                                       | kirsi.m.auro@gsk.com                            | Steering Committee   | Pharmaceutical companies          |
| Simonne Longerich       | Merck, Kenilworth, NJ, United States                                                                                                                                  | simonne.longerich@merck.com                     | Steering Committee   | Pharmaceutical companies          |
| Caroline Fox            | Merck, Kenilworth, NJ, United States                                                                                                                                  | caroline.fox@merck.com                          | Steering Committee   | Pharmaceutical companies          |
| Anders Mälarstig        | Pfizer, New York, NY, United States                                                                                                                                   | anders.malarstig@pfizer.com                     | Steering Committee   | Pharmaceutical companies          |
| Katherine Klinger       | Translational Sciences, Sanofi R&D, Framingham, MA, USA                                                                                                               | katherine.klinger@sanofi.com                    | Steering Committee   | Pharmaceutical companies          |
| Deepak Raipal           | Translational Sciences, Sanofi R&D, Framingham, MA, USA                                                                                                               | deepak.raipal@sanofi.com                        | Steering Committee   | Pharmaceutical companies          |
| Eric Green              | Maze Therapeutics, San Francisco, CA, United States                                                                                                                   | egreen@mazetx.com                               | Steering Committee   | Pharmaceutical companies          |
| Robert Graham           | Maze Therapeutics, San Francisco, CA, United States                                                                                                                   | rgraham@mazetx.com                              | Steering Committee   | Pharmaceutical companies          |
| Robert Yang             | Janssen Biotech, Beerse, Belgium                                                                                                                                      | ryang31@its.jnj.com                             | Steering Committee   | Pharmaceutical companies          |
| Chris O'Donnell         | Novartis Institutes for BioMedical Research, Cambridge, MA, United States                                                                                             | chris.odonnell@novartis.com                     | Steering Committee   | Pharmaceutical companies          |
| Tom P. Mäkelä           | HLIFE, University of Helsinki, Finland                                                                                                                                | tom.makela@helsinki.fi                          | Steering Committee   | University of Helsinki & Biobanks |
| Jaakko Kaprio           | Institute for Molecular Medicine Finland (FIMM), HLIFE, University of Helsinki, Helsinki, Finland                                                                     | jaakko.kaprio@helsinki.fi                       | Steering Committee   | University of Helsinki & Biobanks |
| Petri Virolainen        | Auris Biobank / University of Turku / Hospital District of Southwest Finland, Turku, Finland                                                                          | petri.virolainen@tyks.fi                        | Steering Committee   | University of Helsinki & Biobanks |
| Antti Hakanen           | Auris Biobank / University of Turku / Hospital District of Southwest Finland, Turku, Finland                                                                          | antti.hakanen@tyks.fi                           | Steering Committee   | University of Helsinki & Biobanks |
| Terhi Kilpi             | THL Biobank / Finnish Institute for Health and Welfare (THL), Helsinki, Finland                                                                                       | terhi.kilpi@thl.fi                              | Steering Committee   | University of Helsinki & Biobanks |
| Markus Perola           | THL Biobank / Finnish Institute for Health and Welfare (THL), Helsinki, Finland                                                                                       | markus.perola@thl.fi                            | Steering Committee   | University of Helsinki & Biobanks |
| Jukka Partanen          | Finnish Red Cross Blood Service / Finnish Hematology Registry and Clinical Biobank, Helsinki, Finland                                                                 | jukka.partanen@veripalvelu.fi                   | Steering Committee   | University of Helsinki & Biobanks |
| Anne Pitkäranta         | Helsinki Biobank / Helsinki University and Hospital District of Helsinki and Uusimaa, Helsinki                                                                        | anne.pitkaranta@hus.fi                          | Steering Committee   | University of Helsinki & Biobanks |
| Taneli Raivio           | Helsinki Biobank / Helsinki University and Hospital District of Helsinki and Uusimaa, Helsinki                                                                        | taneli.raivio@hus.fi                            | Steering Committee   | University of Helsinki & Biobanks |
| Raisa Serpi             | Northern Finland Biobank Borealis / University of Oulu / Northern Ostrobothnia Hospital District, Oulu, Finland                                                       | raisa.serpi@ppshp.fi                            | Steering Committee   | University of Helsinki & Biobanks |
| Tarja Laitinen          | Finnish Clinical Biobank Tampere / University of Tampere / Pirkanmaa Hospital District, Tampere, Finland                                                              | tarja.laitinen@pshp.fi                          | Steering Committee   | University of Helsinki & Biobanks |
| Veli-Matti Kosma        | Biobank of Eastern Finland / University of Eastern Finland / Northern Savo Hospital District, Kuopio, Finland                                                         | veli-matti.kosma@uef.fi                         | Steering Committee   | University of Helsinki & Biobanks |
| Jari Laukkanen          | Central Finland Biobank / University of Jyväskylä / Central Finland Health Care District, Jyväskylä, Finland                                                          | jari.laukkanen@ksshp.fi                         | Steering Committee   | University of Helsinki & Biobanks |
| Marco Hautalahti        | FINBB - Finnish biobank cooperative                                                                                                                                   | marco.hautalahti@finbb.fi                       | Steering Committee   | University of Helsinki & Biobanks |
| Outi Tuovila            | Business Finland, Helsinki, Finland                                                                                                                                   | outi.tuovila@businessfinland.fi                 | Steering Committee   | Other Experts/ Non-Voting Members |
| Raimo Pakkanen          | Business Finland, Helsinki, Finland                                                                                                                                   | raimo.pakkanen@businessfinland.fi               | Steering Committee   | Other Experts/ Non-Voting Members |
| Jeffrey Waring          | Abbvie, Chicago, IL, United States                                                                                                                                    | jeff.waring@abbvie.com                          | Scientific Committee | Pharmaceutical companies          |
| Bridget Riley-Gills     | Abbvie, Chicago, IL, United States                                                                                                                                    | bridget.rileygills@abbvie.com                   | Scientific Committee | Pharmaceutical companies          |
| Fedik Rahimov           | Abbvie, Chicago, IL, United States                                                                                                                                    | fedik.rahimov@abbvie.com                        | Scientific Committee | Pharmaceutical companies          |
| Ioanna Tachmazidou      | Astra Zeneca, Cambridge, United Kingdom                                                                                                                               | ioanna.tachmazidou@astrazeneca.com              | Scientific Committee | Pharmaceutical companies          |
| Chia-Yen Chen           | Biogen, Cambridge, MA, United States                                                                                                                                  | chiayen.chen@biogen.com                         | Scientific Committee | Pharmaceutical companies          |
| Heiko Runz              | Biogen, Cambridge, MA, United States                                                                                                                                  | heiko.runz@biogen.com                           | Scientific Committee | Pharmaceutical companies          |
| Zhihao Ding             | Boehringer Ingelheim, Ingelheim am Rhein, Germany                                                                                                                     | zhihao.ding@boehringer-ingelheim.com            | Scientific Committee | Pharmaceutical companies          |
| Marc Jung               | Boehringer Ingelheim, Ingelheim am Rhein, Germany                                                                                                                     | marc_oliver.jung@boehringer-ingelheim.com       | Scientific Committee | Pharmaceutical companies          |
| Shameek Biswas          | Bristol Myers Squibb, New York, NY, United States                                                                                                                     | Shameek.Biswas@bms.com                          | Scientific Committee | Pharmaceutical companies          |
| Rion Pendergrass        | Genentech, San Francisco, CA, United States                                                                                                                           | penders2@gene.com                               | Scientific Committee | Pharmaceutical companies          |
| Julie Hunkapiller       | Genentech, San Francisco, CA, United States                                                                                                                           | hunkapiller.julie@gene.com                      | Scientific Committee | Pharmaceutical companies          |
| Margaret G. Ehm         | GlaxoSmithKline, Collegeville, PA, United States                                                                                                                      | meg.g.ehm@gsk.com                               | Scientific Committee | Pharmaceutical companies          |
| David Pulford           | GlaxoSmithKline, Stevenage, United Kingdom                                                                                                                            | david.x.pulford@gsk.com                         | Scientific Committee | Pharmaceutical companies          |
| Neha Raghavan           | Merck, Kenilworth, NJ, United States                                                                                                                                  | neha.raghavan@merck.com                         | Scientific Committee | Pharmaceutical companies          |
| Adriana Huertas-Vazquez | Merck, Kenilworth, NJ, United States                                                                                                                                  | adriana.huertas.vazquez@merck.com               | Scientific Committee | Pharmaceutical companies          |
| Jae-Hoon Sul            | Merck, Kenilworth, NJ, United States                                                                                                                                  | jae.hoon.sul@merck.com                          | Scientific Committee | Pharmaceutical companies          |
| Anders Mälarstig        | Pfizer, New York, NY, United States                                                                                                                                   | anders.malarstig@pfizer.com                     | Scientific Committee | Pharmaceutical companies          |
| Xinli Hu                | Pfizer, New York, NY, United States                                                                                                                                   | xinli.hu@pfizer.com                             | Scientific Committee | Pharmaceutical companies          |
| Katherine Klinger       | Translational Sciences, Sanofi R&D, Framingham, MA, USA                                                                                                               | katherine.klinger@sanofi.com                    | Scientific Committee | Pharmaceutical companies          |
| Robert Graham           | Maze Therapeutics, San Francisco, CA, United States                                                                                                                   | rgraham@mazetx.com                              | Scientific Committee | Pharmaceutical companies          |
| Eric Green              | Maze Therapeutics, San Francisco, CA, United States                                                                                                                   | egreen@mazetx.com                               | Scientific Committee | Pharmaceutical companies          |
| Sahar Mozaafari         | Maze Therapeutics, San Francisco, CA, United States                                                                                                                   | smozaafari@mazetx.com                           | Scientific Committee | Pharmaceutical companies          |
| Dawn Waterworth         | Janssen Research & Development, LLC, Spring House, PA, United States                                                                                                  | dwatwerwo@its.jnj.com                           | Scientific Committee | Pharmaceutical companies          |
| Nicole Renaud           | Novartis Institutes for BioMedical Research, Cambridge, MA, United States                                                                                             | nicole.renaud@novartis.com                      | Scientific Committee | Pharmaceutical companies          |
| Ma'en Obeidat           | Novartis Institutes for BioMedical Research, Cambridge, MA, United States                                                                                             | maen.obeidat@novartis.com                       | Scientific Committee | Pharmaceutical companies          |
| Samuli Ripatti          | Institute for Molecular Medicine Finland (FIMM), HLIFE, University of Helsinki, Helsinki, Finland                                                                     | samuli.ripatti@helsinki.fi                      | Scientific Committee | University of Helsinki & Biobanks |
| Johanna Schleutker      | Auris Biobank / Univ. of Turku / Hospital District of Southwest Finland, Turku, Finland                                                                               | johanna.schleutker@utu.fi                       | Scientific Committee | University of Helsinki & Biobanks |
| Markus Perola           | THL Biobank / Finnish Institute for Health and Welfare (THL), Helsinki, Finland                                                                                       | markus.perola@thl.fi                            | Scientific Committee | University of Helsinki & Biobanks |
| Mikko Arvas             | Finnish Red Cross Blood Service / Finnish Hematology Registry and Clinical Biobank, Helsinki, Finland                                                                 | mikko.arvas@veripalvelu.fi                      | Scientific Committee | University of Helsinki & Biobanks |
| Olli Carpen             | Helsinki Biobank / Helsinki University and Hospital District of Helsinki and Uusimaa, Helsinki                                                                        | olli.carpen@helsinki.fi                         | Scientific Committee | University of Helsinki & Biobanks |
| Reetta Hinttala         | Northern Finland Biobank Borealis / University of Oulu / Northern Ostrobothnia Hospital District, Oulu, Finland                                                       | reetta.hinttala@oulu.fi                         | Scientific Committee | University of Helsinki & Biobanks |
| Johannes Kettunen       | Northern Finland Biobank Borealis / University of Oulu / Northern Ostrobothnia Hospital District, Oulu, Finland                                                       | johannes.kettunen@oulu.fi                       | Scientific Committee | University of Helsinki & Biobanks |
| Arto Mannemaa           | Biobank of Eastern Finland / University of Eastern Finland / Northern Savo Hospital District, Kuopio, Finland                                                         | arto.mannemaa@uef.fi                            | Scientific Committee | University of Helsinki & Biobanks |
| Katrina Aalto-Setälä    | Faculty of Medicine and Health Technology, Tampere University, Tampere, Finland                                                                                       | katrina.aalto-setala@tuni.fi                    | Scientific Committee | University of Helsinki & Biobanks |
| Mika Kähönen            | Finnish Clinical Biobank Tampere / University of Tampere / Pirkanmaa Hospital District, Tampere, Finland                                                              | mika.kahonen@uta.fi                             | Scientific Committee | University of Helsinki & Biobanks |
| Jari Laukkanen          | Central Finland Biobank / University of Jyväskylä / Central Finland Health Care District, Jyväskylä, Finland                                                          | jari.laukkanen@ksshp.fi                         | Scientific Committee | University of Helsinki & Biobanks |
| Johanna Mäkelä          | FINBB - Finnish biobank cooperative                                                                                                                                   | johanna.makela@finbb.fi                         | Scientific Committee | University of Helsinki & Biobanks |
| Reetta Kälviäinen       | Northern Savo Hospital District, Kuopio, Finland                                                                                                                      | reetta.kalviainen@kuh.fi                        | Clinical Groups      | Neurology Group                   |
| Valtteri Julkunen       | Northern Savo Hospital District, Kuopio, Finland                                                                                                                      | valtteri.julkunen@kuh.fi                        | Clinical Groups      | Neurology Group                   |
| Hilkka Soinen           | Northern Savo Hospital District, Kuopio, Finland                                                                                                                      | hilkka.soinen@uef.fi                            | Clinical Groups      | Neurology Group                   |
| Anne Remes              | Northern Ostrobothnia Hospital District, Oulu, Finland                                                                                                                | anne.remes@oulu.fi                              | Clinical Groups      | Neurology Group                   |
| Mikko Hiltunen          | University of Eastern Finland, Kuopio, Finland                                                                                                                        | mikko.hiltunen@uef.fi                           | Clinical Groups      | Neurology Group                   |
| Jukka Peltola           | Pirkanmaa Hospital District, Tampere, Finland                                                                                                                         | jukka.peltola@pshp.fi                           | Clinical Groups      | Neurology Group                   |
| Minna Raivio            | Hospital District of Helsinki and Uusimaa, Helsinki, Finland                                                                                                          | minna.raivio@gen.fi                             | Clinical Groups      | Neurology Group                   |
| Pentti Tiernari         | Hospital District of Helsinki and Uusimaa, Helsinki, Finland                                                                                                          | pentti.tiernari@hus.fi                          | Clinical Groups      | Neurology Group                   |
| Juha Rinne              | Hospital District of Southwest Finland, Turku, Finland                                                                                                                | juha.rinne@tyks.fi                              | Clinical Groups      | Neurology Group                   |
| Roosa Kallionpää        | Hospital District of Southwest Finland, Turku, Finland                                                                                                                | roosa.kallionpaa@tyks.fi                        | Clinical Groups      | Neurology Group                   |
| Juulia Partanen         | Institute for Molecular Medicine Finland, HLIFE, University of Helsinki, Finland                                                                                      | juulia.partanen@helsinki.fi                     | Clinical Groups      | Neurology Group                   |
| Ali Abbasi              | Abbvie, Chicago, IL, United States                                                                                                                                    | ali.abbasi@abbvie.com                           | Clinical Groups      | Neurology Group                   |
| Adam Ziemann            | Abbvie, Chicago, IL, United States                                                                                                                                    | adam.ziemann@abbvie.com                         | Clinical Groups      | Neurology Group                   |
| Nizar Smaoui            | Abbvie, Chicago, IL, United States                                                                                                                                    | nizar.smaoui@abbvie.com                         | Clinical Groups      | Neurology Group                   |



|                          |                                                                                                                                                                                             |                                         |                 |                                |
|--------------------------|---------------------------------------------------------------------------------------------------------------------------------------------------------------------------------------------|-----------------------------------------|-----------------|--------------------------------|
| Anne Lehtonen            | Abbvie, Chicago, IL, United States                                                                                                                                                          | anne.lehtonen@abbvie.com                | Clinical Groups | Neurology Group                |
| Susan Eaton              | Biogen, Cambridge, MA, United States                                                                                                                                                        | susan.eaton@biogen.com                  | Clinical Groups | Neurology Group                |
| Heiko Runz               | Biogen, Cambridge, MA, United States                                                                                                                                                        | heiko.runz@biogen.com                   | Clinical Groups | Neurology Group                |
| Sanni Lahdenperä         | Biogen, Cambridge, MA, United States                                                                                                                                                        | sanni.lahdenpera@biogen.com             | Clinical Groups | Neurology Group                |
| Shameek Biswas           | Bristol Myers Squibb, New York, NY, United States                                                                                                                                           | shameek.biswas@bms.com                  | Clinical Groups | Neurology Group                |
| Julie Hunkapiller        | Genentech, San Francisco, CA, United States                                                                                                                                                 | hunkapiller.julie@gene.com              | Clinical Groups | Neurology Group                |
| Natalie Bowers           | Genentech, San Francisco, CA, United States                                                                                                                                                 | bowersn1@gene.com                       | Clinical Groups | Neurology Group                |
| Edmond Teng              | Genentech, San Francisco, CA, United States                                                                                                                                                 | teng.edmond@gene.com                    | Clinical Groups | Neurology Group                |
| Rion Pendergrass         | Genentech, San Francisco, CA, United States                                                                                                                                                 | penders2@gene.com                       | Clinical Groups | Neurology Group                |
| Fanli Xu                 | GlaxoSmithKline, Brentford, United Kingdom                                                                                                                                                  | chun-fang.2.xu@gsk.com                  | Clinical Groups | Neurology Group                |
| David Pulford            | GlaxoSmithKline, Stevenage, United Kingdom                                                                                                                                                  | david.x.pulford@gsk.com                 | Clinical Groups | Neurology Group                |
| Kirsi Auro               | GlaxoSmithKline, Espoo, Finland                                                                                                                                                             | kirsi.m.auro@gsk.com                    | Clinical Groups | Neurology Group                |
| Laura Addis              | GlaxoSmithKline, Brentford, United Kingdom                                                                                                                                                  | laura.x.addis@gsk.com                   | Clinical Groups | Neurology Group                |
| John Eicher              | GlaxoSmithKline, Brentford, United Kingdom                                                                                                                                                  | john.d.eicher@gsk.com                   | Clinical Groups | Neurology Group                |
| Qingqin S Li             | Janssen Research & Development, LLC, Titusville, NJ 08560, United States                                                                                                                    | QL2@its.jnj.com                         | Clinical Groups | Neurology Group                |
| Karen He                 | Janssen Research & Development, LLC, Spring House, PA, United States                                                                                                                        | khe2@its.jnj.com                        | Clinical Groups | Neurology Group                |
| Ekaterina Khrantsova     | Janssen Research & Development, LLC, Spring House, PA, United States                                                                                                                        | ekhrants@its.jnj.com                    | Clinical Groups | Neurology Group                |
| Neha Raghavan            | Merck, Kenilworth, NJ, United States                                                                                                                                                        | neha.raghavan@merck.com                 | Clinical Groups | Neurology Group                |
| Martti Färkkilä          | Hospital District of Helsinki and Uusimaa, Helsinki, Finland                                                                                                                                | martti.farkkila@hus.fi                  | Clinical Groups | Gastroenterology Group         |
| Jukka Koskela            | Hospital District of Helsinki and Uusimaa, Helsinki, Finland                                                                                                                                | jukka.koskela@helsinki.fi               | Clinical Groups | Gastroenterology Group         |
| Sampsa Pikkariainen      | Hospital District of Helsinki and Uusimaa, Helsinki, Finland                                                                                                                                | sampsaa.pikkariainen@hus.fi             | Clinical Groups | Gastroenterology Group         |
| Airi Jussila             | Pirkanmaa Hospital District, Tampere, Finland                                                                                                                                               | airi.jussila@pshp.fi                    | Clinical Groups | Gastroenterology Group         |
| Katri Kaukinen           | Pirkanmaa Hospital District, Tampere, Finland                                                                                                                                               | katri.kaukinen@tuni.fi                  | Clinical Groups | Gastroenterology Group         |
| Timo Blomster            | Northern Ostrobothnia Hospital District, Oulu, Finland                                                                                                                                      | timo.blomster@ppshp.fi                  | Clinical Groups | Gastroenterology Group         |
| Mikko Kiviniemi          | Northern Savo Hospital District, Kuopio, Finland                                                                                                                                            | mikko.kiviniemi@kuh.fi                  | Clinical Groups | Gastroenterology Group         |
| Markku Voutilainen       | Hospital District of Southwest Finland, Turku, Finland                                                                                                                                      | markku.voutilainen@tyks.fi              | Clinical Groups | Gastroenterology Group         |
| Mark Daly                | Institute for Molecular Medicine, Finland (FIMM), HiLIFE, University of Helsinki, Helsinki, Finland; Broad Institute of MIT and Harvard; Massachusetts General Hospital                     | mark.daly@helsinki.fi                   | Clinical Groups | Gastroenterology Group         |
| Ali Abbasi               | Abbvie, Chicago, IL, United States                                                                                                                                                          | ali.abbasi@abbvie.com                   | Clinical Groups | Gastroenterology Group         |
| Jeffrey Waring           | Abbvie, Chicago, IL, United States                                                                                                                                                          | jeff.waring@abbvie.com                  | Clinical Groups | Gastroenterology Group         |
| Nizar Smaoui             | Abbvie, Chicago, IL, United States                                                                                                                                                          | nizar.smaoui@abbvie.com                 | Clinical Groups | Gastroenterology Group         |
| Fedik Rahimov            | Abbvie, Chicago, IL, United States                                                                                                                                                          | fedik.rahimov@abbvie.com                | Clinical Groups | Gastroenterology Group         |
| Anne Lehtonen            | Abbvie, Chicago, IL, United States                                                                                                                                                          | anne.lehtonen@abbvie.com                | Clinical Groups | Gastroenterology Group         |
| Tim Lu                   | Genentech, San Francisco, CA, United States                                                                                                                                                 | lut8@gene.com                           | Clinical Groups | Gastroenterology Group         |
| Natalie Bowers           | Genentech, San Francisco, CA, United States                                                                                                                                                 | bowersn1@gene.com                       | Clinical Groups | Gastroenterology Group         |
| Rion Pendergrass         | Genentech, San Francisco, CA, United States                                                                                                                                                 | penders2@gene.com                       | Clinical Groups | Gastroenterology Group         |
| Linda McCarthy           | GlaxoSmithKline, Brentford, United Kingdom                                                                                                                                                  | linda.c.mccarthy@gsk.com                | Clinical Groups | Gastroenterology Group         |
| Amy Hart                 | Janssen Research & Development, LLC, Spring House, PA, United States                                                                                                                        | ahart13@its.jnj.com                     | Clinical Groups | Gastroenterology Group         |
| Meijian Guan             | Janssen Research & Development, LLC, Spring House, PA, United States                                                                                                                        | mguan4@its.jnj.com                      | Clinical Groups | Gastroenterology Group         |
| Jason Miller             | Merck, Kenilworth, NJ, United States                                                                                                                                                        | jason.miller4@merck.com                 | Clinical Groups | Gastroenterology Group         |
| Kirsi Kalpala            | Pfizer, New York, NY, United States                                                                                                                                                         | kirsi.kalpala@pfizer.com                | Clinical Groups | Gastroenterology Group         |
| Melissa Miller           | Pfizer, New York, NY, United States                                                                                                                                                         | melissa.r.miller@pfizer.com             | Clinical Groups | Gastroenterology Group         |
| Xinli Hu                 | Pfizer, New York, NY, United States                                                                                                                                                         | xinli.hu@pfizer.com                     | Clinical Groups | Gastroenterology Group         |
| Kari Eklund              | Hospital District of Helsinki and Uusimaa, Helsinki, Finland                                                                                                                                | kari.eklund@hus.fi                      | Clinical Groups | Rheumatology Group             |
| Antti Palomäki           | Hospital District of Southwest Finland, Turku, Finland                                                                                                                                      | apalo@utu.fi                            | Clinical Groups | Rheumatology Group             |
| Pia Isomäki              | Pirkanmaa Hospital District, Tampere, Finland                                                                                                                                               | pia.isomaki@pshp.fi                     | Clinical Groups | Rheumatology Group             |
| Laura Piilä              | Hospital District of Southwest Finland, Turku, Finland                                                                                                                                      | laura.piila@fimm.fi,laura.piila@tyks.fi | Clinical Groups | Rheumatology Group             |
| Olli Kaipiaisen-Seppänen | Northern Savo Hospital District, Kuopio, Finland                                                                                                                                            | oili.kaipiaisen-seppanen@kuh.fi         | Clinical Groups | Rheumatology Group             |
| Johanna Huhtakangas      | Northern Ostrobothnia Hospital District, Oulu, Finland                                                                                                                                      | johanna.huhtakangas@kuh.fi              | Clinical Groups | Rheumatology Group             |
| Nina Mars                | Institute for Molecular Medicine Finland (FIMM), HiLIFE, University of Helsinki, Helsinki, Finland                                                                                          | nina.mars@helsinki.fi                   | Clinical Groups | Rheumatology Group             |
| Ali Abbasi               | Abbvie, Chicago, IL, United States                                                                                                                                                          | ali.abbasi@abbvie.com                   | Clinical Groups | Rheumatology Group             |
| Jeffrey Waring           | Abbvie, Chicago, IL, United States                                                                                                                                                          | jeff.waring@abbvie.com                  | Clinical Groups | Rheumatology Group             |
| Fedik Rahimov            | Abbvie, Chicago, IL, United States                                                                                                                                                          | fedik.rahimov@abbvie.com                | Clinical Groups | Rheumatology Group             |
| Apinya Lertratanakul     | Abbvie, Chicago, IL, United States                                                                                                                                                          | apinya.lertratanakul@abbvie.com         | Clinical Groups | Rheumatology Group             |
| Nizar Smaoui             | Abbvie, Chicago, IL, United States                                                                                                                                                          | nizar.smaoui@abbvie.com                 | Clinical Groups | Rheumatology Group             |
| Anne Lehtonen            | Abbvie, Chicago, IL, United States                                                                                                                                                          | anne.lehtonen@abbvie.com                | Clinical Groups | Rheumatology Group             |
| Marla Hochfeld           | Bristol Myers Squibb, New York, NY, United States                                                                                                                                           | mhochfeld@bms.com                       | Clinical Groups | Rheumatology Group             |
| Natalie Bowers           | Genentech, San Francisco, CA, United States                                                                                                                                                 | bowersn1@gene.com                       | Clinical Groups | Rheumatology Group             |
| Rion Pendergrass         | Genentech, San Francisco, CA, United States                                                                                                                                                 | penders2@gene.com                       | Clinical Groups | Rheumatology Group             |
| Jorge Esparza Gordillo   | GlaxoSmithKline, Brentford, United Kingdom                                                                                                                                                  | jorge.x.esparza-gordillo@gsk.com        | Clinical Groups | Rheumatology Group             |
| Kirsi Auro               | GlaxoSmithKline, Espoo, Finland                                                                                                                                                             | kirsi.m.auro@gsk.com                    | Clinical Groups | Rheumatology Group             |
| Dawn Waterworth          | Janssen Research & Development, LLC, Spring House, PA, United States                                                                                                                        | dwaterwo@its.jnj.com                    | Clinical Groups | Rheumatology Group             |
| Fabiana Farias           | Merck, Kenilworth, NJ, United States                                                                                                                                                        | fabiana.farias@merck.com                | Clinical Groups | Rheumatology Group             |
| Kirsi Kalpala            | Pfizer, New York, NY, United States                                                                                                                                                         | kirsi.kalpala@pfizer.com                | Clinical Groups | Rheumatology Group             |
| Nan Bing                 | Pfizer, New York, NY, United States                                                                                                                                                         | nan.bing@pfizer.com                     | Clinical Groups | Rheumatology Group             |
| Xinli Hu                 | Pfizer, New York, NY, United States                                                                                                                                                         | xinli.hu@pfizer.com                     | Clinical Groups | Rheumatology Group             |
| Tarja Laitinen           | Pirkanmaa Hospital District, Tampere, Finland                                                                                                                                               | tarja.laitinen@pshp.fi                  | Clinical Groups | Pulmonology Group              |
| Margit Pelkonen          | Northern Savo Hospital District, Kuopio, Finland                                                                                                                                            | margit.pelkonen@kuh.fi                  | Clinical Groups | Pulmonology Group              |
| Paula Kauppi             | Hospital District of Helsinki and Uusimaa, Helsinki, Finland                                                                                                                                | paula.kauppi@hus.fi                     | Clinical Groups | Pulmonology Group              |
| Hannu Kankaanranta       | University of Gothenburg, Gothenburg, Sweden/ Seinäjoki Central Hospital, Seinäjoki, Finland/ Tampere University, Tampere, Finland                                                          | hannu.kankaanranta@tuni.fi              | Clinical Groups | Pulmonology Group              |
| Terttu Harju             | Northern Ostrobothnia Hospital District, Oulu, Finland                                                                                                                                      | terttu.harju@oulu.fi                    | Clinical Groups | Pulmonology Group              |
| Riitta Lahesmaa          | Hospital District of Southwest Finland, Turku, Finland                                                                                                                                      | rlahes@utu.fi                           | Clinical Groups | Pulmonology Group              |
| Nizar Smaoui             | Abbvie, Chicago, IL, United States                                                                                                                                                          | nizar.smaoui@abbvie.com                 | Clinical Groups | Pulmonology Group              |
| Glenda Lassi             | Astra Zeneca, Cambridge, United Kingdom                                                                                                                                                     | glenda.lassi@astrazeneca.com            | Clinical Groups | Pulmonology Group              |
| Susan Eaton              | Biogen, Cambridge, MA, United States                                                                                                                                                        | susan.eaton@biogen.com                  | Clinical Groups | Pulmonology Group              |
| Hubert Chen              | Genentech, San Francisco, CA, United States                                                                                                                                                 | chenh37@gene.com                        | Clinical Groups | Pulmonology Group              |
| Rion Pendergrass         | Genentech, San Francisco, CA, United States                                                                                                                                                 | penders2@gene.com                       | Clinical Groups | Pulmonology Group              |
| Natalie Bowers           | Genentech, San Francisco, CA, United States                                                                                                                                                 | bowersn1@gene.com                       | Clinical Groups | Pulmonology Group              |
| Joanna Betts             | GlaxoSmithKline, Brentford, United Kingdom                                                                                                                                                  | joanna.c.betts@gsk.com                  | Clinical Groups | Pulmonology Group              |
| Kirsi Auro               | GlaxoSmithKline, Espoo, Finland                                                                                                                                                             | kirsi.m.auro@gsk.com                    | Clinical Groups | Pulmonology Group              |
| Rajashree Mishra         | GlaxoSmithKline, Brentford, United Kingdom                                                                                                                                                  | rajashree.x.mishra@gsk.com              | Clinical Groups | Pulmonology Group              |
| Majd Mouded              | Novartis, Basel, Switzerland                                                                                                                                                                | majd.mouded@novartis.com                | Clinical Groups | Pulmonology Group              |
| Debby Ngo                | Novartis, Basel, Switzerland                                                                                                                                                                | debby.ngo@novartis.com                  | Clinical Groups | Pulmonology Group              |
| Teemu Niiranen           | Finnish Institute for Health and Welfare (THL), Helsinki, Finland                                                                                                                           | teemu.niiranen@thl.fi                   | Clinical Groups | Cardiometabolic Diseases Group |
| Felix Vaura              | Finnish Institute for Health and Welfare (THL), Helsinki, Finland                                                                                                                           | fechva@utu.fi                           | Clinical Groups | Cardiometabolic Diseases Group |
| Veikko Salomaa           | Finnish Institute for Health and Welfare (THL), Helsinki, Finland                                                                                                                           | veikko.salomaa@thl.fi                   | Clinical Groups | Cardiometabolic Diseases Group |
| Kaj Metsärinne           | Hospital District of Southwest Finland, Turku, Finland                                                                                                                                      | kj.metsarinne@tyks.fi                   | Clinical Groups | Cardiometabolic Diseases Group |
| Jenni Aittokallio        | Hospital District of Southwest Finland, Turku, Finland                                                                                                                                      | jemato@utu.fi                           | Clinical Groups | Cardiometabolic Diseases Group |
| Mika Kähönen             | Pirkanmaa Hospital District, Tampere, Finland                                                                                                                                               | mika.kahonen@uta.fi                     | Clinical Groups | Cardiometabolic Diseases Group |
| Jussi Hemesniemi         | Pirkanmaa Hospital District, Tampere, Finland                                                                                                                                               | jussi.hemesniemi@tuni.fi                | Clinical Groups | Cardiometabolic Diseases Group |
| Daniel Gordin            | Hospital District of Helsinki and Uusimaa, Helsinki, Finland                                                                                                                                | daniel.gordin@hus.fi                    | Clinical Groups | Cardiometabolic Diseases Group |
| Juha Sinisalo            | Hospital District of Helsinki and Uusimaa, Helsinki, Finland                                                                                                                                | juha.sinisalo@hus.fi                    | Clinical Groups | Cardiometabolic Diseases Group |
| Marja-Riitta Taskinen    | Hospital District of Helsinki and Uusimaa, Helsinki, Finland                                                                                                                                | marja-riitta.taskinen@helsinki.fi       | Clinical Groups | Cardiometabolic Diseases Group |
| Tinamajja Tuomi          | Hospital District of Helsinki and Uusimaa, Helsinki, Finland                                                                                                                                | tinamajja.tuomi@hus.fi                  | Clinical Groups | Cardiometabolic Diseases Group |
| Timo Hiltunen            | Hospital District of Helsinki and Uusimaa, Helsinki, Finland                                                                                                                                | timo.hiltunen@hus.fi                    | Clinical Groups | Cardiometabolic Diseases Group |
| Jari Laukkanen           | Central Finland Health Care District, Jyväskylä, Finland                                                                                                                                    | jari.laukkanen@ksshp.fi                 | Clinical Groups | Cardiometabolic Diseases Group |
| Amanda Elliott           | Institute for Molecular Medicine Finland (FIMM), HiLIFE, University of Helsinki, Helsinki, Finland; Broad Institute, Cambridge, MA, USA and Massachusetts General Hospital, Boston, MA, USA | ae Elliott@broadinstitute.org           | Clinical Groups | Cardiometabolic Diseases Group |
| Mary Pat Reeve           | Institute for Molecular Medicine Finland (FIMM), HiLIFE, University of Helsinki, Helsinki, Finland                                                                                          | mary.reeve@helsinki.fi                  | Clinical Groups | Cardiometabolic Diseases Group |
| Sanni Ruotsalainen       | Institute for Molecular Medicine Finland (FIMM), HiLIFE, University of Helsinki, Helsinki, Finland                                                                                          | sanni.ruotsalainen@helsinki.fi          | Clinical Groups | Cardiometabolic Diseases Group |
| Benjamin Challis         | Astra Zeneca, Cambridge, United Kingdom                                                                                                                                                     | benjamin.challis@astrazeneca.com        | Clinical Groups | Cardiometabolic Diseases Group |
| Dirk Paul                | Astra Zeneca, Cambridge, United Kingdom                                                                                                                                                     | dirk.paul@astrazeneca.com               | Clinical Groups | Cardiometabolic Diseases Group |
| Julie Hunkapiller        | Genentech, San Francisco, CA, United States                                                                                                                                                 | hunkapiller.julie@gene.com              | Clinical Groups | Cardiometabolic Diseases Group |
| Natalie Bowers           | Genentech, San Francisco, CA, United States                                                                                                                                                 | bowersn1@gene.com                       | Clinical Groups | Cardiometabolic Diseases Group |
| Rion Pendergrass         | Genentech, San Francisco, CA, United States                                                                                                                                                 | penders2@gene.com                       | Clinical Groups | Cardiometabolic Diseases Group |
| Audrey Chu               | GlaxoSmithKline, Brentford, United Kingdom                                                                                                                                                  | audrey.y.chu@gsk.com                    | Clinical Groups | Cardiometabolic Diseases Group |
| Kirsi Auro               | GlaxoSmithKline, Espoo, Finland                                                                                                                                                             | kirsi.m.auro@gsk.com                    | Clinical Groups | Cardiometabolic Diseases Group |
| Demot Reilly             | Janssen Research & Development, LLC, Boston, MA, United States                                                                                                                              | dreil1@its.jnj.com                      | Clinical Groups | Cardiometabolic Diseases Group |
| Mike Mendelson           | Novartis, Boston, MA, United States                                                                                                                                                         | mike.mendelson@novartis.com             | Clinical Groups | Cardiometabolic Diseases Group |
| Jaakko Parkkinen         | Pfizer, New York, NY, United States                                                                                                                                                         | jaakko.parkkinen@pfizer.com             | Clinical Groups | Cardiometabolic Diseases Group |
| Melissa Miller           | Pfizer, New York, NY, United States                                                                                                                                                         | melissa.r.miller@pfizer.com             | Clinical Groups | Cardiometabolic Diseases Group |
| Tuomo Meretoja           | Hospital District of Helsinki and Uusimaa, Helsinki, Finland                                                                                                                                | tuomo.meretoja@hus.fi                   | Clinical Groups | Oncology Group                 |
| Heikki Joensuu           | Hospital District of Helsinki and Uusimaa, Helsinki, Finland                                                                                                                                | heikki.joensuu@hus.fi                   | Clinical Groups | Oncology Group                 |
| Olli Carpen              | Hospital District of Helsinki and Uusimaa, Helsinki, Finland                                                                                                                                | olli.carpen@helsinki.fi                 | Clinical Groups | Oncology Group                 |
| Johanna Mattson          | Hospital District of Helsinki and Uusimaa, Helsinki, Finland                                                                                                                                | johanna.mattson@hus.fi                  | Clinical Groups | Oncology Group                 |
| Eveliina Salminen        | Hospital District of Helsinki and Uusimaa, Helsinki, Finland                                                                                                                                | eveliina.e.salminen@hus.fi              | Clinical Groups | Oncology Group                 |
| Annikka Auranen          | Pirkanmaa Hospital District, Tampere, Finland                                                                                                                                               | aanaura@utu.fi                          | Clinical Groups | Oncology Group                 |
| Peeter Karhitala         | Northern Ostrobothnia Hospital District, Oulu, Finland                                                                                                                                      | peeter.karhitala@oulu.fi                | Clinical Groups | Oncology Group                 |

|                            |                                                                                                                                                                                             |                                    |                 |                                       |
|----------------------------|---------------------------------------------------------------------------------------------------------------------------------------------------------------------------------------------|------------------------------------|-----------------|---------------------------------------|
| Päivi Auvinen              | Northern Savo Hospital District, Kuopio, Finland                                                                                                                                            | paivi.auvinen@kuh.fi               | Clinical Groups | Oncology Group                        |
| Klaus Elenius              | Hospital District of Southwest Finland, Turku, Finland                                                                                                                                      | klaus.elenius@utu.fi               | Clinical Groups | Oncology Group                        |
| Johanna Schleutker         | Hospital District of Southwest Finland, Turku, Finland                                                                                                                                      | johanna.schleutker@utu.fi          | Clinical Groups | Oncology Group                        |
| Esa Pitkanen               | Institute for Molecular Medicine Finland (FIMM), HILIFE, University of Helsinki, Helsinki, Finland                                                                                          | esa.pitkanen@helsinki.fi           | Clinical Groups | Oncology Group                        |
| Nina Mars                  | Institute for Molecular Medicine Finland (FIMM), HILIFE, University of Helsinki, Helsinki, Finland                                                                                          | nina.mars@helsinki.fi              | Clinical Groups | Oncology Group                        |
| Mark Daly                  | Institute for Molecular Medicine Finland (FIMM), HILIFE, University of Helsinki, Helsinki, Finland; Broad Institute of MIT and Harvard; Massachusetts General Hospital                      | mark.daly@helsinki.fi              | Clinical Groups | Oncology Group                        |
| Rejla Popovic              | Abbvie, Chicago, IL, United States                                                                                                                                                          | rejla.popovic@abbvie.com           | Clinical Groups | Oncology Group                        |
| Jeffrey Waring             | Abbvie, Chicago, IL, United States                                                                                                                                                          | jeff.waring@abbvie.com             | Clinical Groups | Oncology Group                        |
| Bridget Riley-Gillis       | Abbvie, Chicago, IL, United States                                                                                                                                                          | bridget.rileygillis@abbvie.com     | Clinical Groups | Oncology Group                        |
| Anne Lehtonen              | Abbvie, Chicago, IL, United States                                                                                                                                                          | anne.lehtonen@abbvie.com           | Clinical Groups | Oncology Group                        |
| Jennifer Schutzman         | Genentech, San Francisco, CA, United States                                                                                                                                                 | schutzman.jennifer@gene.com        | Clinical Groups | Oncology Group                        |
| Julie Hunkapiller          | Genentech, San Francisco, CA, United States                                                                                                                                                 | hunkapiller.julie@gene.com         | Clinical Groups | Oncology Group                        |
| Natalie Bowers             | Genentech, San Francisco, CA, United States                                                                                                                                                 | bowersn1@gene.com                  | Clinical Groups | Oncology Group                        |
| Rion Pendergrass           | Genentech, San Francisco, CA, United States                                                                                                                                                 | penders2@gene.com                  | Clinical Groups | Oncology Group                        |
| Diptee Kulkarni            | GlaxoSmithKline, Brentford, United Kingdom                                                                                                                                                  | dptee.a.kulkarni@gsk.com           | Clinical Groups | Oncology Group                        |
| Kirsi Auro                 | GlaxoSmithKline, Espoo, Finland                                                                                                                                                             | kirsi.m.auro@gsk.com               | Clinical Groups | Oncology Group                        |
| Alessandro Porello         | Janssen Research & Development, LLC, Spring House, PA, United States                                                                                                                        | APorello@ITS.JNJ.com               | Clinical Groups | Oncology Group                        |
| Andrey Loboda              | Merck, Kenilworth, NJ, United States                                                                                                                                                        | andrey.loboda@merck.com            | Clinical Groups | Oncology Group                        |
| Heli Lehtonen              | Pfizer, New York, NY, United States                                                                                                                                                         | heli.lehtonen@pfizer.com           | Clinical Groups | Oncology Group                        |
| Stefan McDonough           | Pfizer, New York, NY, United States                                                                                                                                                         | stefan.mcdonough@pfizer.com        | Clinical Groups | Oncology Group                        |
| Sauli Vuoti                | Janssen-Cilag Oy, Espoo, Finland                                                                                                                                                            | svuoti@its.jnj.com                 | Clinical Groups | Oncology Group                        |
| Kai Kaamiranta             | Northern Savo Hospital District, Kuopio, Finland                                                                                                                                            | kai.kaamiranta@uef.fi              | Clinical Groups | Ophthalmology Group                   |
| Joni A Turunen             | Helsinki University Hospital and University of Helsinki, Helsinki, Finland; Eye Genetics Group, Folkhälsan Research Center, Helsinki, Finland                                               | joni.turunen@helsinki.fi           | Clinical Groups | Ophthalmology Group                   |
| Terhi Ollila               | Hospital District of Helsinki and Uusimaa, Helsinki, Finland                                                                                                                                | terhi.ollila@hus.fi                | Clinical Groups | Ophthalmology Group                   |
| Hannu Uusitalo             | Pirkanmaa Hospital District, Tampere, Finland                                                                                                                                               | hannu.uusitalo@tuni.fi             | Clinical Groups | Ophthalmology Group                   |
| Juha Karjalainen           | Institute for Molecular Medicine Finland (FIMM), HILIFE, University of Helsinki, Helsinki, Finland                                                                                          | juha.karjalainen@helsinki.fi       | Clinical Groups | Ophthalmology Group                   |
| Esa Pitkanen               | Institute for Molecular Medicine Finland (FIMM), HILIFE, University of Helsinki, Helsinki, Finland                                                                                          | esa.pitkanen@helsinki.fi           | Clinical Groups | Ophthalmology Group                   |
| Mengzhen Liu               | Abbvie, Chicago, IL, United States                                                                                                                                                          | mengzhen.liu@abbvie.com            | Clinical Groups | Ophthalmology Group                   |
| Heiko Runz                 | Biogen, Cambridge, MA, United States                                                                                                                                                        | heiko.runz@biogen.com              | Clinical Groups | Ophthalmology Group                   |
| Stephanie Loomis           | Biogen, Cambridge, MA, United States                                                                                                                                                        | stephanie.loomis@biogen.com        | Clinical Groups | Ophthalmology Group                   |
| Erich Strauss              | Genentech, San Francisco, CA, United States                                                                                                                                                 | strauss.erich@gene.com             | Clinical Groups | Ophthalmology Group                   |
| Natalie Bowers             | Genentech, San Francisco, CA, United States                                                                                                                                                 | bowersn1@gene.com                  | Clinical Groups | Ophthalmology Group                   |
| Hao Chen                   | Genentech, San Francisco, CA, United States                                                                                                                                                 | hao@gene.com                       | Clinical Groups | Ophthalmology Group                   |
| Rion Pendergrass           | Genentech, San Francisco, CA, United States                                                                                                                                                 | penders2@gene.com                  | Clinical Groups | Ophthalmology Group                   |
| Kaisa Tasanen              | Northern Ostrobothnia Hospital District, Oulu, Finland                                                                                                                                      | kaisa.tasanen-maatta@oulu.fi       | Clinical Groups | Dermatology Group                     |
| Laura Huilaja              | Northern Ostrobothnia Hospital District, Oulu, Finland                                                                                                                                      | laura.huilaja@oulu.fi              | Clinical Groups | Dermatology Group                     |
| Katarina Hannula-Jouppi    | Hospital District of Helsinki and Uusimaa, Helsinki, Finland                                                                                                                                | katarina.hannula-jouppi@hus.fi     | Clinical Groups | Dermatology Group                     |
| Teea Salmi                 | Pirkanmaa Hospital District, Tampere, Finland                                                                                                                                               | teea.salmi@ppshp.fi                | Clinical Groups | Dermatology Group                     |
| Sirkku Peltonen            | Hospital District of Southwest Finland, Turku, Finland                                                                                                                                      | sipelt@utu.fi                      | Clinical Groups | Dermatology Group                     |
| Leena Koulu                | Hospital District of Southwest Finland, Turku, Finland                                                                                                                                      | leena.koulu@tyks.fi                | Clinical Groups | Dermatology Group                     |
| Nizar Smaoui               | Abbvie, Chicago, IL, United States                                                                                                                                                          | nizar.smaoui@abbvie.com            | Clinical Groups | Dermatology Group                     |
| Fedik Rahimov              | Abbvie, Chicago, IL, United States                                                                                                                                                          | fedik.rahimov@abbvie.com           | Clinical Groups | Dermatology Group                     |
| Anne Lehtonen              | Abbvie, Chicago, IL, United States                                                                                                                                                          | anne.lehtonen@abbvie.com           | Clinical Groups | Dermatology Group                     |
| David Choy                 | Genentech, San Francisco, CA, United States                                                                                                                                                 | choy.david@gene.com                | Clinical Groups | Dermatology Group                     |
| Rion Pendergrass           | Genentech, San Francisco, CA, United States                                                                                                                                                 | penders2@gene.com                  | Clinical Groups | Dermatology Group                     |
| Dawn Waterworth            | Janssen Research & Development, LLC, Spring House, PA, United States                                                                                                                        | dwaterwo@its.jnj.com               | Clinical Groups | Dermatology Group                     |
| Kirsi Kalpala              | Pfizer, New York, NY, United States                                                                                                                                                         | kirsi.kalpala@pfizer.com           | Clinical Groups | Dermatology Group                     |
| Ying Wu                    | Pfizer, New York, NY, United States                                                                                                                                                         | ying.wu3@pfizer.com                | Clinical Groups | Dermatology Group                     |
| Pirkko Pussinen            | Hospital District of Helsinki and Uusimaa, Helsinki, Finland                                                                                                                                | pirkko.pussinen@helsinki.fi        | Clinical Groups | Odontology Group                      |
| Aino Salminen              | Hospital District of Helsinki and Uusimaa, Helsinki, Finland                                                                                                                                | aino.m.salminen@helsinki.fi        | Clinical Groups | Odontology Group                      |
| Tuula Salo                 | Hospital District of Helsinki and Uusimaa, Helsinki, Finland                                                                                                                                | tuula.salo@helsinki.fi             | Clinical Groups | Odontology Group                      |
| David Rice                 | Hospital District of Helsinki and Uusimaa, Helsinki, Finland                                                                                                                                | david.rice@helsinki.fi             | Clinical Groups | Odontology Group                      |
| Pekka Nieminen             | Hospital District of Helsinki and Uusimaa, Helsinki, Finland                                                                                                                                | pekka.nieminen@helsinki.fi         | Clinical Groups | Odontology Group                      |
| Ulla Palotie               | Hospital District of Helsinki and Uusimaa, Helsinki, Finland                                                                                                                                | ulla.palotie@helsinki.fi           | Clinical Groups | Odontology Group                      |
| Maria Siponen              | Northern Savo Hospital District, Kuopio, Finland                                                                                                                                            | maria.siponen@uef.fi               | Clinical Groups | Odontology Group                      |
| Liisa Suominen             | Northern Savo Hospital District, Kuopio, Finland                                                                                                                                            | liisa.suominen@uef.fi              | Clinical Groups | Odontology Group                      |
| Päivi Mäntylä              | Northern Savo Hospital District, Kuopio, Finland                                                                                                                                            | paivi.mantyla@uef.fi               | Clinical Groups | Odontology Group                      |
| Ulvi Gursoy                | Hospital District of Southwest Finland, Turku, Finland                                                                                                                                      | ulvi.gursoy@utu.fi                 | Clinical Groups | Odontology Group                      |
| Vuokko Anttonen            | Northern Ostrobothnia Hospital District, Oulu, Finland                                                                                                                                      | vuokko.anttonen@oulu.fi            | Clinical Groups | Odontology Group                      |
| Kirsi Sipilä               | Research Unit of Oral Health Sciences Faculty of Medicine, University of Oulu, Oulu, Finland; Medical Research Center, Oulu, Oulu University Hospital and University of Oulu, Oulu, Finland | kirsi.sipila@oulu.fi               | Clinical Groups | Odontology Group                      |
| Rion Pendergrass           | Genentech, San Francisco, CA, United States                                                                                                                                                 | pendergress.sarah@gene.com         | Clinical Groups | Odontology Group                      |
| Hannele Laivuori           | Institute for Molecular Medicine Finland (FIMM), HILIFE, University of Helsinki, Helsinki, Finland                                                                                          | hannele.laivuori@helsinki.fi       | Clinical Groups | Women's Health and Reproduction Group |
| Venla Kura                 | Pirkanmaa Hospital District, Tampere, Finland                                                                                                                                               | venla.kura@tuni.fi                 | Clinical Groups | Women's Health and Reproduction Group |
| Laura Kotaniemi-Talonen    | Pirkanmaa Hospital District, Tampere, Finland                                                                                                                                               | laura.kotaniemi-talonen@tuni.fi    | Clinical Groups | Women's Health and Reproduction Group |
| Oskari Heikinheimo         | Hospital District of Helsinki and Uusimaa, Helsinki, Finland                                                                                                                                | oskari.heikinheimo@helsinki.fi     | Clinical Groups | Women's Health and Reproduction Group |
| Ilkka Kalliala             | Hospital District of Helsinki and Uusimaa, Helsinki, Finland                                                                                                                                | ilkka.kalliala@hus.fi              | Clinical Groups | Women's Health and Reproduction Group |
| Lauri Aanttonen            | Hospital District of Southwest Finland, Turku, Finland                                                                                                                                      | lauri.aanttonen@helsinki.fi        | Clinical Groups | Women's Health and Reproduction Group |
| Vappu Jokima               | Hospital District of Southwest Finland, Turku, Finland                                                                                                                                      | vappu.jokima@utu.fi                | Clinical Groups | Women's Health and Reproduction Group |
| Johannes Kettunen          | Northern Ostrobothnia Hospital District, Oulu, Finland                                                                                                                                      | johannes.kettunen@oulu.fi          | Clinical Groups | Women's Health and Reproduction Group |
| Marja Väärasmäki           | Northern Ostrobothnia Hospital District, Oulu, Finland                                                                                                                                      | marja.vaarasmaki@oulu.fi           | Clinical Groups | Women's Health and Reproduction Group |
| Ouli Umari                 | Northern Ostrobothnia Hospital District, Oulu, Finland                                                                                                                                      | ouli.umari@oulu.fi                 | Clinical Groups | Women's Health and Reproduction Group |
| Laure Morin-Papunen        | Northern Ostrobothnia Hospital District, Oulu, Finland                                                                                                                                      | lmp@cc.oulu.fi                     | Clinical Groups | Women's Health and Reproduction Group |
| Maarit Ninimäki            | Northern Ostrobothnia Hospital District, Oulu, Finland                                                                                                                                      | maarit.ninimaki@oulu.fi            | Clinical Groups | Women's Health and Reproduction Group |
| Terhi Pilttonen            | Northern Ostrobothnia Hospital District, Oulu, Finland                                                                                                                                      | terhi.pilttonen@oulu.fi            | Clinical Groups | Women's Health and Reproduction Group |
| Katja Kivinen              | Institute for Molecular Medicine Finland (FIMM), HILIFE, University of Helsinki, Helsinki, Finland                                                                                          | katja.kivinen@helsinki.fi          | Clinical Groups | Women's Health and Reproduction Group |
| Elisabeth Widen            | Institute for Molecular Medicine Finland (FIMM), HILIFE, University of Helsinki, Helsinki, Finland                                                                                          | elisabeth.widen@helsinki.fi        | Clinical Groups | Women's Health and Reproduction Group |
| Taru Tukiainen             | Institute for Molecular Medicine Finland (FIMM), HILIFE, University of Helsinki, Helsinki, Finland                                                                                          | taru.tukiainen@helsinki.fi         | Clinical Groups | Women's Health and Reproduction Group |
| Mary Pat Reeve             | Institute for Molecular Medicine Finland (FIMM), HILIFE, University of Helsinki, Helsinki, Finland                                                                                          | mary.reeve@helsinki.fi             | Clinical Groups | Women's Health and Reproduction Group |
| Mark Daly                  | Institute for Molecular Medicine Finland (FIMM), HILIFE, University of Helsinki, Helsinki, Finland; Broad Institute of MIT and Harvard; Massachusetts General Hospital                      | mark.daly@helsinki.fi              | Clinical Groups | Women's Health and Reproduction Group |
| Niko Välimäki              | University of Helsinki, Helsinki, Finland                                                                                                                                                   | niko.valimaki@helsinki.fi          | Clinical Groups | Women's Health and Reproduction Group |
| Eja Laakkonen              | University of Jyväskylä, Jyväskylä, Finland                                                                                                                                                 | eja.k.laakkonen@juu.fi             | Clinical Groups | Women's Health and Reproduction Group |
| Jaakko Tyymi               | University of Oulu, Oulu, Finland / University of Tampere, Tampere, Finland                                                                                                                 | jaakko.tyymi@oulu.fi               | Clinical Groups | Women's Health and Reproduction Group |
| Heidi Silven               | University of Oulu, Oulu, Finland                                                                                                                                                           | heidi.silven@student.oulu.fi       | Clinical Groups | Women's Health and Reproduction Group |
| Eeva Silz                  | University of Oulu, Oulu, Finland                                                                                                                                                           | eeva.silz@oulu.fi                  | Clinical Groups | Women's Health and Reproduction Group |
| Rikka Affman               | University of Oulu, Oulu, Finland                                                                                                                                                           | rikka.affman@oulu.fi               | Clinical Groups | Women's Health and Reproduction Group |
| Susanna Savukoski          | University of Oulu, Oulu, Finland                                                                                                                                                           | susanna.savukoski@oulu.fi          | Clinical Groups | Women's Health and Reproduction Group |
| Trin Laisk                 | Estonian biobank, Tartu, Estonia                                                                                                                                                            | trin.laisk@ut.ee                   | Clinical Groups | Women's Health and Reproduction Group |
| Natalia Pujol              | Estonian biobank, Tartu, Estonia                                                                                                                                                            | natalia.pujolgualdo@oulu.fi        | Clinical Groups | Women's Health and Reproduction Group |
| Mengzhen Liu               | Abbvie, Chicago, IL, United States                                                                                                                                                          | mengzhen.liu@abbvie.com            | Clinical Groups | Women's Health and Reproduction Group |
| Bridget Riley-Gillis       | Abbvie, Chicago, IL, United States                                                                                                                                                          | bridget.rileygillis@abbvie.com     | Clinical Groups | Women's Health and Reproduction Group |
| Rion Pendergrass           | Genentech, San Francisco, CA, United States                                                                                                                                                 | penders2@gene.com                  | Clinical Groups | Women's Health and Reproduction Group |
| Janet Kumar                | GlaxoSmithKline, Collegeville, PA, United States                                                                                                                                            | janet.x.kumar@gsk.com              | Clinical Groups | Women's Health and Reproduction Group |
| Kirsi Auro                 | GlaxoSmithKline, Espoo, Finland                                                                                                                                                             | kirsi.m.auro@gsk.com               | Clinical Groups | Women's Health and Reproduction Group |
| Iiris Hovatta              | University of Helsinki, Finland                                                                                                                                                             | iiris.hovatta@helsinki.fi          | Clinical Groups | Depression group                      |
| Chia-Yen Chen              | Biogen, Cambridge, MA, United States                                                                                                                                                        | chiayen.chen@biogen.com            | Clinical Groups | Depression group                      |
| Erkki Isometsä             | Hospital District of Helsinki and Uusimaa, Helsinki, Finland                                                                                                                                | erkki.isometsa@hus.fi              | Clinical Groups | Depression group                      |
| Hanna Ollila               | Institute for Molecular Medicine Finland (FIMM), HILIFE, University of Helsinki, Helsinki, Finland                                                                                          | hanna.m.ollila@helsinki.fi         | Clinical Groups | Depression group                      |
| Jaana Suvisaari            | Finnish Institute for Health and Welfare (THL), Helsinki, Finland                                                                                                                           | jaana.suvisaari@thl.fi             | Clinical Groups | Depression group                      |
| Thomas Damm Als            | Aarhus University, Denmark                                                                                                                                                                  | tda@biomed.au.dk                   | Clinical Groups | Depression group                      |
| Antti Mäkitie              | Department of Otorhinolaryngology - Head and Neck Surgery, University of Helsinki and Helsinki University Hospital, Helsinki, Finland                                                       | antti.makitie@helsinki.fi          | Clinical Groups | ENT (ear, nose and throat) Group      |
| Argyio Bizaki-Vallaskangas | Pirkanmaa Hospital District, Tampere, Finland                                                                                                                                               | argyio.bizaki-vallaskangas@tuni.fi | Clinical Groups | ENT (ear, nose and throat) Group      |
| Sanna Toppiila-Salmi       | University of Helsinki, Finland                                                                                                                                                             | sanna.salmi@helsinki.fi            | Clinical Groups | ENT (ear, nose and throat) Group      |
| Tytti Willberg             | Hospital District of Southwest Finland, Turku, Finland                                                                                                                                      | tytti.willberg@tyks.fi             | Clinical Groups | ENT (ear, nose and throat) Group      |
| Elmo Saarentaus            | Institute for Molecular Medicine Finland (FIMM), HILIFE, University of Helsinki, Helsinki, Finland                                                                                          | elmo.saarentaus@helsinki.fi        | Clinical Groups | ENT (ear, nose and throat) Group      |
| Antti Aamiala              | Hospital District of Helsinki and Uusimaa, Helsinki, Finland                                                                                                                                | antti.aamiala@hus.fi               | Clinical Groups | ENT (ear, nose and throat) Group      |
| Evelina Salminen           | Hospital District of Helsinki and Uusimaa, Helsinki, Finland                                                                                                                                | evelina.e.salminen@hus.fi          | Clinical Groups | ENT (ear, nose and throat) Group      |
| Elisa Rahikkala            | Northern Ostrobothnia Hospital District, Oulu, Finland                                                                                                                                      | elisa.rahikkala@ppshp.fi           | Clinical Groups | ENT (ear, nose and throat) Group      |



|                                         |                                                                                                                                                                                             |                                                             |                                    |                                                                           |
|-----------------------------------------|---------------------------------------------------------------------------------------------------------------------------------------------------------------------------------------------|-------------------------------------------------------------|------------------------------------|---------------------------------------------------------------------------|
| Johannes Kettunen<br>Kristina Aittomäki | Northern Ostrobothnia Hospital District, Oulu, Finland<br>Department of Medical Genetics, Helsinki University Central Hospital, Helsinki, Finland                                           | johannes.kettunen@oulu.fi<br>kristina.aittomaki@helsinki.fi | Clinical Groups<br>Clinical Groups | ENT (ear, nose and throat) Group<br>POI (premature ovarian failure) Group |
| Fredrik Åberg                           | Transplantation and Liver Surgery Clinic, Helsinki University Hospital, Helsinki University, Helsinki, Finland                                                                              | fredrik.aberg@helsinki.fi                                   | Clinical Groups                    | LiverScore Group                                                          |
| Mitja Kurki                             | Institute for Molecular Medicine Finland (FIMM), HiLIFE, University of Helsinki, Helsinki, Finland; Broad Institute, Cambridge, MA, United States                                           | mkurki@broadinstitute.org                                   | FinnGen Analysis working grc       | FinnGen Analysis working group                                            |
| Samuli Ripatti                          | Institute for Molecular Medicine Finland (FIMM), HiLIFE, University of Helsinki, Helsinki, Finland                                                                                          | samuli.ripatti@helsinki.fi                                  | FinnGen Analysis working grc       | FinnGen Analysis working group                                            |
| Mark Daly                               | Institute for Molecular Medicine, Finland (FIMM), HiLIFE, University of Helsinki, Helsinki, Finland; Broad Institute of MIT and Harvard, Massachusetts General Hospital                     | mark.daly@helsinki.fi                                       | FinnGen Analysis working grc       | FinnGen Analysis working group                                            |
| Juha Karjalainen                        | Institute for Molecular Medicine Finland (FIMM), HiLIFE, University of Helsinki, Helsinki, Finland                                                                                          | juha.karjalainen@helsinki.fi                                | FinnGen Analysis working grc       | FinnGen Analysis working group                                            |
| Aki Havulinna                           | Institute for Molecular Medicine Finland (FIMM), HiLIFE, University of Helsinki, Helsinki, Finland; Finnish Institute for Health and Welfare (THL), Helsinki, Finland                       | aki.havulinna@helsinki.fi                                   | FinnGen Analysis working grc       | FinnGen Analysis working group                                            |
| Juha Mehtonen                           | Institute for Molecular Medicine Finland (FIMM), HiLIFE, University of Helsinki, Helsinki, Finland                                                                                          | juha.mehtonen@helsinki.fi                                   | FinnGen Analysis working grc       | FinnGen Analysis working group                                            |
| Priit Palta                             | Institute for Molecular Medicine Finland (FIMM), HiLIFE, University of Helsinki, Helsinki, Finland                                                                                          | priit.palta@helsinki.fi                                     | FinnGen Analysis working grc       | FinnGen Analysis working group                                            |
| Shabbeer Hassan                         | Institute for Molecular Medicine Finland (FIMM), HiLIFE, University of Helsinki, Helsinki, Finland                                                                                          | shabbeer.hassan@helsinki.fi                                 | FinnGen Analysis working grc       | FinnGen Analysis working group                                            |
| Pietro Della Briotta Parolo             | Institute for Molecular Medicine Finland (FIMM), HiLIFE, University of Helsinki, Helsinki, Finland                                                                                          | pietro.dellabriottaparolo@helsinki.fi                       | FinnGen Analysis working grc       | FinnGen Analysis working group                                            |
| Wei Zhou                                | Broad Institute, Cambridge, MA, United States                                                                                                                                               | wzhou@broadinstitute.org                                    | FinnGen Analysis working grc       | FinnGen Analysis working group                                            |
| Mutaamba Maasha                         | Broad Institute, Cambridge, MA, United States                                                                                                                                               | mmaasha@broadinstitute.org                                  | FinnGen Analysis working grc       | FinnGen Analysis working group                                            |
| Shabbeer Hassan                         | Institute for Molecular Medicine Finland (FIMM), HiLIFE, University of Helsinki, Helsinki, Finland                                                                                          | shabbeer.hassan@helsinki.fi                                 | FinnGen Analysis working grc       | FinnGen Analysis working group                                            |
| Susanna Lemmela                         | Institute for Molecular Medicine Finland (FIMM), HiLIFE, University of Helsinki, Helsinki, Finland                                                                                          | susanna.lemmela@helsinki.fi                                 | FinnGen Analysis working grc       | FinnGen Analysis working group                                            |
| Manuel Rivas                            | University of Stanford, Stanford, CA, United States                                                                                                                                         | mrivas@stanford.edu                                         | FinnGen Analysis working grc       | FinnGen Analysis working group                                            |
| Mari E. Niemi                           | Institute for Molecular Medicine Finland (FIMM), HiLIFE, University of Helsinki, Helsinki, Finland                                                                                          | mari.e.niemi@helsinki.fi                                    | FinnGen Analysis working grc       | FinnGen Analysis working group                                            |
| Aamo Palotie                            | Institute for Molecular Medicine Finland (FIMM), HiLIFE, University of Helsinki, Helsinki, Finland                                                                                          | aamo.palotie@helsinki.fi                                    | FinnGen Analysis working grc       | FinnGen Analysis working group                                            |
| Aoxing Liu                              | Institute for Molecular Medicine Finland (FIMM), HiLIFE, University of Helsinki, Helsinki, Finland                                                                                          | aoxing.liu@helsinki.fi                                      | FinnGen Analysis working grc       | FinnGen Analysis working group                                            |
| Arto Lehisto                            | Institute for Molecular Medicine Finland (FIMM), HiLIFE, University of Helsinki, Helsinki, Finland                                                                                          | arto.lehisto@helsinki.fi                                    | FinnGen Analysis working grc       | FinnGen Analysis working group                                            |
| Andrea Ganna                            | Institute for Molecular Medicine Finland (FIMM), HiLIFE, University of Helsinki, Helsinki, Finland                                                                                          | aganna@broadinstitute.org                                   | FinnGen Analysis working grc       | FinnGen Analysis working group                                            |
| Vincent Llorens                         | Institute for Molecular Medicine Finland (FIMM), HiLIFE, University of Helsinki, Helsinki, Finland                                                                                          | vincent.llorens@helsinki.fi                                 | FinnGen Analysis working grc       | FinnGen Analysis working group                                            |
| Hannele Laivuori                        | Institute for Molecular Medicine Finland (FIMM), HiLIFE, University of Helsinki, Helsinki, Finland                                                                                          | hannele.laivuori@helsinki.fi                                | FinnGen Analysis working grc       | FinnGen Analysis working group                                            |
| Taru Tukiainen                          | Institute for Molecular Medicine Finland (FIMM), HiLIFE, University of Helsinki, Helsinki, Finland                                                                                          | taru.tukiainen@helsinki.fi                                  | FinnGen Analysis working grc       | FinnGen Analysis working group                                            |
| Mary Pat Reeve                          | Institute for Molecular Medicine Finland (FIMM), HiLIFE, University of Helsinki, Helsinki, Finland                                                                                          | mary.reeve@helsinki.fi                                      | FinnGen Analysis working grc       | FinnGen Analysis working group                                            |
| Henrike Heyne                           | Institute for Molecular Medicine Finland (FIMM), HiLIFE, University of Helsinki, Helsinki, Finland                                                                                          | hheyne@broadinstitute.org                                   | FinnGen Analysis working grc       | FinnGen Analysis working group                                            |
| Nina Mars                               | Institute for Molecular Medicine Finland (FIMM), HiLIFE, University of Helsinki, Helsinki, Finland                                                                                          | nina.mars@helsinki.fi                                       | FinnGen Analysis working grc       | FinnGen Analysis working group                                            |
| Joel Rämö                               | Institute for Molecular Medicine Finland (FIMM), HiLIFE, University of Helsinki, Helsinki, Finland                                                                                          | joel.ramo@helsinki.fi                                       | FinnGen Analysis working grc       | FinnGen Analysis working group                                            |
| Elmo Saarentaus                         | Institute for Molecular Medicine Finland (FIMM), HiLIFE, University of Helsinki, Helsinki, Finland                                                                                          | elmo.saarentaus@helsinki.fi                                 | FinnGen Analysis working grc       | FinnGen Analysis working group                                            |
| Hanna Ollila                            | Institute for Molecular Medicine Finland (FIMM), HiLIFE, University of Helsinki, Helsinki, Finland                                                                                          | hanna.m.ollila@helsinki.fi                                  | FinnGen Analysis working grc       | FinnGen Analysis working group                                            |
| Rodos Rodosthenous                      | Institute for Molecular Medicine Finland (FIMM), HiLIFE, University of Helsinki, Helsinki, Finland                                                                                          | rodos.rodosthenous@helsinki.fi                              | FinnGen Analysis working grc       | FinnGen Analysis working group                                            |
| Satu Strausz                            | Institute for Molecular Medicine Finland (FIMM), HiLIFE, University of Helsinki, Helsinki, Finland                                                                                          | satu.strausz@helsinki.fi                                    | FinnGen Analysis working grc       | FinnGen Analysis working group                                            |
| Tuula Palotie                           | University of Helsinki and Hospital District of Helsinki and Uusimaa, Helsinki, Finland                                                                                                     | tuula.palotie@helsinki.fi                                   | FinnGen Analysis working grc       | FinnGen Analysis working group                                            |
| Kimmo Palin                             | University of Helsinki, Helsinki, Finland                                                                                                                                                   | kimmo.palin@helsinki.fi                                     | FinnGen Analysis working grc       | FinnGen Analysis working group                                            |
| Javier Garcia-Tabuenca                  | University of Tampere, Tampere, Finland                                                                                                                                                     | javier.graciatabuenca@tuni.fi                               | FinnGen Analysis working grc       | FinnGen Analysis working group                                            |
| Harri Siirtola                          | University of Tampere, Tampere, Finland                                                                                                                                                     | harri.siirtola@tuni.fi                                      | FinnGen Analysis working grc       | FinnGen Analysis working group                                            |
| Tuomo Kiiskinen                         | Institute for Molecular Medicine Finland (FIMM), HiLIFE, University of Helsinki, Helsinki, Finland                                                                                          | tuomo.kiiskinen@helsinki.fi                                 | FinnGen Analysis working grc       | FinnGen Analysis working group                                            |
| Jiwoo Lee                               | Institute for Molecular Medicine Finland (FIMM), HiLIFE, University of Helsinki, Helsinki, Finland; Broad Institute, Cambridge, MA, United States                                           | jiwoo.lee@helsinki.fi                                       | FinnGen Analysis working grc       | FinnGen Analysis working group                                            |
| Kristin Tsuo                            | Institute for Molecular Medicine Finland (FIMM), HiLIFE, University of Helsinki, Helsinki, Finland; Broad Institute, Cambridge, MA, United States                                           | kristintsu@fas.harvard.edu                                  | FinnGen Analysis working grc       | FinnGen Analysis working group                                            |
| Amanda Elliott                          | Institute for Molecular Medicine Finland (FIMM), HiLIFE, University of Helsinki, Helsinki, Finland; Broad Institute, Cambridge, MA, USA and Massachusetts General Hospital, Boston, MA, USA | aelliott@broadinstitute.org                                 | FinnGen Analysis working grc       | FinnGen Analysis working group                                            |
| Kati Kristiansson                       | THL Biobank / Finnish Institute for Health and Welfare (THL), Helsinki, Finland                                                                                                             | kati.kristiansson@thl.fi                                    | FinnGen Analysis working grc       | FinnGen Analysis working group                                            |
| Mikko Arvas                             | Finnish Red Cross Blood Service / Finnish Hematology Registry and Clinical Biobank, Helsinki, Finland                                                                                       | mikko.arvas@veripalvelu.fi                                  | FinnGen Analysis working grc       | FinnGen Analysis working group                                            |
| Kati Hyvärinen                          | Finnish Red Cross Blood Service, Helsinki, Finland                                                                                                                                          | kati.hyvarinen@veripalvelu.fi                               | FinnGen Analysis working grc       | FinnGen Analysis working group                                            |
| Jarmo Ritari                            | Finnish Red Cross Blood Service, Helsinki, Finland                                                                                                                                          | jarmo.ritari@veripalvelu.fi                                 | FinnGen Analysis working grc       | FinnGen Analysis working group                                            |
| Olli Carpen                             | Helsinki Biobank / Helsinki University and Hospital District of Helsinki and Uusimaa, Helsinki                                                                                              | oli.carpen@helsinki.fi                                      | FinnGen Analysis working grc       | FinnGen Analysis working group                                            |
| Johannes Kettunen                       | Northern Finland Biobank Borealis / University of Oulu / Northern Ostrobothnia Hospital District, Oulu, Finland                                                                             | johannes.kettunen@oulu.fi                                   | FinnGen Analysis working grc       | FinnGen Analysis working group                                            |
| Katri Pylkäs                            | University of Oulu, Oulu, Finland                                                                                                                                                           | katri.pylkas@oulu.fi                                        | FinnGen Analysis working grc       | FinnGen Analysis working group                                            |
| Eeva Silz                               | University of Oulu, Oulu, Finland                                                                                                                                                           | eeva.silz@oulu.fi                                           | FinnGen Analysis working grc       | FinnGen Analysis working group                                            |
| Minna Karjalainen                       | University of Oulu, Oulu, Finland                                                                                                                                                           | minna.karjalainen@oulu.fi                                   | FinnGen Analysis working grc       | FinnGen Analysis working group                                            |
| Tuomo Mantere                           | Northern Finland Biobank Borealis / University of Oulu / Northern Ostrobothnia Hospital District, Oulu, Finland                                                                             | tuomo.mantere@oulu.fi                                       | FinnGen Analysis working grc       | FinnGen Analysis working group                                            |
| Eeva Kangasniemi                        | Finnish Clinical Biobank Tampere / University of Tampere / Pirkanmaa Hospital District, Tampere, Finland                                                                                    | eeva.kangasniemi@pshp.fi                                    | FinnGen Analysis working grc       | FinnGen Analysis working group                                            |
| Sami Heikkinen                          | University of Eastern Finland, Kuopio, Finland                                                                                                                                              | sami.heikkinen@uef.fi                                       | FinnGen Analysis working grc       | FinnGen Analysis working group                                            |
| Arto Mannemaa                           | Biobank of Eastern Finland / University of Eastern Finland / Northern Savo Hospital District, Kuopio, Finland                                                                               | arto.mannemaa@uef.fi                                        | FinnGen Analysis working grc       | FinnGen Analysis working group                                            |
| Eija Laakkonen                          | University of Jyväskylä, Jyväskylä, Finland                                                                                                                                                 | eija.k.laakkonen@juu.fi                                     | FinnGen Analysis working grc       | FinnGen Analysis working group                                            |
| Nina Pitkanen                           | Auria Biobank / University of Turku / Hospital District of Southwest Finland, Turku, Finland                                                                                                | Nina.Pitkanen@tyks.fi                                       | FinnGen Analysis working grc       | FinnGen Analysis working group                                            |
| Samuel Lessard                          | Translational Sciences, Sanofi R&D, Framingham, MA, USA                                                                                                                                     | samuel.lessard@sanofi.com                                   | FinnGen Analysis working grc       | FinnGen Analysis working group                                            |
| Clément Chatelain                       | Translational Sciences, Sanofi R&D, Framingham, MA, USA                                                                                                                                     | clement.chatelain@sanofi.com                                | FinnGen Analysis working grc       | FinnGen Analysis working group                                            |
| Perttu Terho                            | Auria Biobank / University of Turku / Hospital District of Southwest Finland, Turku, Finland                                                                                                | perttu.terho@tyks.fi                                        | Biobank directors                  | Biobank directors                                                         |
| Sirpa Soini                             | THL Biobank / Finnish Institute for Health and Welfare (THL), Helsinki, Finland                                                                                                             | sirpa.soini@thl.fi                                          | Biobank directors                  | Biobank directors                                                         |
| Jukka Partanen                          | Finnish Red Cross Blood Service / Finnish Hematology Registry and Clinical Biobank, Helsinki, Finland                                                                                       | jukka.partanen@veripalvelu.fi                               | Biobank directors                  | Biobank directors                                                         |
| Eero Punkka                             | Helsinki Biobank / Helsinki University and Hospital District of Helsinki and Uusimaa, Helsinki                                                                                              | eero.punkka@hus.fi                                          | Biobank directors                  | Biobank directors                                                         |
| Raisa Serpi                             | Northern Finland Biobank Borealis / University of Oulu / Northern Ostrobothnia Hospital District, Oulu, Finland                                                                             | raisa.serpi@ppshp.fi                                        | Biobank directors                  | Biobank directors                                                         |
| Sanna Siltanen                          | Finnish Clinical Biobank Tampere / University of Tampere / Pirkanmaa Hospital District, Tampere, Finland                                                                                    | sanna.siltanen@pshp.fi                                      | Biobank directors                  | Biobank directors                                                         |
| Veli-Matti Kosma                        | Biobank of Eastern Finland / University of Eastern Finland / Northern Savo Hospital District, Kuopio, Finland                                                                               | veli-matti.kosma@uef.fi                                     | Biobank directors                  | Biobank directors                                                         |
| Teijo Kuopio                            | Central Finland Biobank / University of Jyväskylä / Central Finland Health Care District, Jyväskylä, Finland                                                                                | teijo.kuopio@ksshp.fi                                       | Biobank directors                  | Biobank directors                                                         |
| Anu Jalanko                             | Institute for Molecular Medicine Finland (FIMM), HiLIFE, University of Helsinki, Helsinki, Finland                                                                                          | anu.jalanko@helsinki.fi                                     | FinnGen Teams                      | Administration                                                            |
| Huei-Yi Shen                            | Institute for Molecular Medicine Finland (FIMM), HiLIFE, University of Helsinki, Helsinki, Finland                                                                                          | huei-yi.shen@helsinki.fi                                    | FinnGen Teams                      | Administration                                                            |
| Risto Kajanne                           | Institute for Molecular Medicine Finland (FIMM), HiLIFE, University of Helsinki, Helsinki, Finland                                                                                          | risto.kajanne@helsinki.fi                                   | FinnGen Teams                      | Administration                                                            |
| Mervi Aavikko                           | Institute for Molecular Medicine Finland (FIMM), HiLIFE, University of Helsinki, Helsinki, Finland                                                                                          | mervi.aavikko@helsinki.fi                                   | FinnGen Teams                      | Administration                                                            |
| Henna Palin                             | Finnish Clinical Biobank Tampere / University of Tampere / Pirkanmaa Hospital District, Tampere, Finland                                                                                    | henna.palin@pshp.fi                                         | FinnGen Teams                      | Administration                                                            |

|                               |                                                                                                                                                                       |                                       |               |                                     |
|-------------------------------|-----------------------------------------------------------------------------------------------------------------------------------------------------------------------|---------------------------------------|---------------|-------------------------------------|
| Malla-Maria Linna             | Helsinki Biobank / Helsinki University and Hospital District of Helsinki and Uusimaa, Helsinki                                                                        | malla-maria.linna@hus.fi              | FinnGen Teams | Administration                      |
| Mitja Kurki                   | Institute for Molecular Medicine Finland (FIMM), HiLIFE, University of Helsinki, Helsinki, Finland; Broad Institute, Cambridge, MA, United States                     | mkurki@broadinstitute.org             | FinnGen Teams | Analysis                            |
| Juha Karjalainen              | Institute for Molecular Medicine Finland (FIMM), HiLIFE, University of Helsinki, Helsinki, Finland                                                                    | juha.karjalainen@helsinki.fi          | FinnGen Teams | Analysis                            |
| Pietro Della Briotta Parolo   | Institute for Molecular Medicine Finland (FIMM), HiLIFE, University of Helsinki, Helsinki, Finland                                                                    | pietro.dellabriottaparolo@helsinki.fi | FinnGen Teams | Analysis                            |
| Arto Lehisto                  | Institute for Molecular Medicine Finland (FIMM), HiLIFE, University of Helsinki, Helsinki, Finland                                                                    | arto.lehisto@helsinki.fi              | FinnGen Teams | Analysis                            |
| Juha Mehtonen                 | Institute for Molecular Medicine Finland (FIMM), HiLIFE, University of Helsinki, Helsinki, Finland                                                                    | juha.mehtonen@helsinki.fi             | FinnGen Teams | Analysis                            |
| Wei Zhou                      | Broad Institute, Cambridge, MA, United States                                                                                                                         | wzhou@broadinstitute.org              | FinnGen Teams | Analysis                            |
| Masahiro Kanai                | Broad Institute, Cambridge, MA, United States                                                                                                                         | mkana@broadinstitute.org              | FinnGen Teams | Analysis                            |
| Mutaamba Maasha               | Broad Institute, Cambridge, MA, United States                                                                                                                         | mmaasha@broadinstitute.org            | FinnGen Teams | Analysis                            |
| Hannele Laivuori              | Institute for Molecular Medicine Finland (FIMM), HiLIFE, University of Helsinki, Helsinki, Finland                                                                    | hannele.laivuori@helsinki.fi          | FinnGen Teams | Clinical Endpoint Development       |
| Aki Havulinna                 | Institute for Molecular Medicine Finland (FIMM), HiLIFE, University of Helsinki, Helsinki, Finland; Finnish Institute for Health and Welfare (THL), Helsinki, Finland | aki.havulinna@helsinki.fi             | FinnGen Teams | Clinical Endpoint Development       |
| Susanna Lemmela               | Institute for Molecular Medicine Finland (FIMM), HiLIFE, University of Helsinki, Helsinki, Finland                                                                    | susanna.lemmela@helsinki.fi           | FinnGen Teams | Clinical Endpoint Development       |
| Tuomo Kiiskinen               | Institute for Molecular Medicine Finland (FIMM), HiLIFE, University of Helsinki, Helsinki, Finland                                                                    | tuomo.kiiskinen@helsinki.fi           | FinnGen Teams | Clinical Endpoint Development       |
| L. Elisa Lahtela              | Institute for Molecular Medicine Finland (FIMM), HiLIFE, University of Helsinki, Helsinki, Finland                                                                    | laura.lahtela@helsinki.fi             | FinnGen Teams | Clinical Endpoint Development       |
| Mari Kaunisto                 | Institute for Molecular Medicine Finland (FIMM), HiLIFE, University of Helsinki, Helsinki, Finland                                                                    | mari.kaunisto@helsinki.fi             | FinnGen Teams | Communication                       |
| Elna Kilpeläinen              | Institute for Molecular Medicine Finland (FIMM), HiLIFE, University of Helsinki, Helsinki, Finland                                                                    | elina.kilpelainen@helsinki.fi         | FinnGen Teams | E-Science                           |
| Timo P. Sipilä                | Institute for Molecular Medicine Finland (FIMM), HiLIFE, University of Helsinki, Helsinki, Finland                                                                    | timo.p.sipila@helsinki.fi             | FinnGen Teams | E-Science                           |
| Oluwaseun Alexander Dada      | Institute for Molecular Medicine Finland (FIMM), HiLIFE, University of Helsinki, Helsinki, Finland                                                                    | alexander.dada@helsinki.fi            | FinnGen Teams | E-Science                           |
| Awaisa Ghazal                 | Institute for Molecular Medicine Finland (FIMM), HiLIFE, University of Helsinki, Helsinki, Finland                                                                    | awaisa.ghazal@helsinki.fi             | FinnGen Teams | E-Science                           |
| Anastasia Kytölä              | Institute for Molecular Medicine Finland (FIMM), HiLIFE, University of Helsinki, Helsinki, Finland                                                                    | anastasia.shcherban@helsinki.fi       | FinnGen Teams | E-Science                           |
| Rigbe Weldatsadik             | Institute for Molecular Medicine Finland (FIMM), HiLIFE, University of Helsinki, Helsinki, Finland                                                                    | rigbe.weldatsadik@helsinki.fi         | FinnGen Teams | E-Science                           |
| Sanni Ruotsalainen            | Institute for Molecular Medicine Finland (FIMM), HiLIFE, University of Helsinki, Helsinki, Finland                                                                    | sanni.ruotsalainen@helsinki.fi        | FinnGen Teams | E-Science                           |
| Kati Donner                   | Institute for Molecular Medicine Finland (FIMM), HiLIFE, University of Helsinki, Helsinki, Finland                                                                    | kati.donner@helsinki.fi               | FinnGen Teams | Genotyping                          |
| Timo P. Sipilä                | Institute for Molecular Medicine Finland (FIMM), HiLIFE, University of Helsinki, Helsinki, Finland                                                                    | timo.p.sipila@helsinki.fi             | FinnGen Teams | Genotyping                          |
| Anu Loukola                   | Helsinki Biobank / Helsinki University and Hospital District of Helsinki and Uusimaa, Helsinki                                                                        | anu.loukola@hus.fi                    | FinnGen Teams | Sample Collection Coordination      |
| Päivi Laiho                   | THL Biobank / Finnish Institute for Health and Welfare (THL), Helsinki, Finland                                                                                       | paivi.laiho@thl.fi                    | FinnGen Teams | Sample Logistics                    |
| Tuuli Sistonen                | THL Biobank / Finnish Institute for Health and Welfare (THL), Helsinki, Finland                                                                                       | tuuli.sistonen@thl.fi                 | FinnGen Teams | Sample Logistics                    |
| Essi Kaiharju                 | THL Biobank / Finnish Institute for Health and Welfare (THL), Helsinki, Finland                                                                                       | essi.kaiharju@thl.fi                  | FinnGen Teams | Sample Logistics                    |
| Markku Laukkanen              | THL Biobank / Finnish Institute for Health and Welfare (THL), Helsinki, Finland                                                                                       | markku.laukkanen@thl.fi               | FinnGen Teams | Sample Logistics                    |
| Elna Järvensivu               | THL Biobank / Finnish Institute for Health and Welfare (THL), Helsinki, Finland                                                                                       | elina.jarvensivu@thl.fi               | FinnGen Teams | Sample Logistics                    |
| Sini Lähteenmäki              | THL Biobank / Finnish Institute for Health and Welfare (THL), Helsinki, Finland                                                                                       | sini.lahteenmaki@thl.fi               | FinnGen Teams | Sample Logistics                    |
| Lotta Männikkö                | THL Biobank / Finnish Institute for Health and Welfare (THL), Helsinki, Finland                                                                                       | lotta.mannikko@thl.fi                 | FinnGen Teams | Sample Logistics                    |
| Regis Wong                    | THL Biobank / Finnish Institute for Health and Welfare (THL), Helsinki, Finland                                                                                       | regis.wong@thl.fi                     | FinnGen Teams | Sample Logistics                    |
| Auli Toivola                  | THL Biobank / Finnish Institute for Health and Welfare (THL), Helsinki, Finland                                                                                       | auli.toivola@thl.fi                   | FinnGen Teams | Sample Logistics                    |
| Minna Brunfeldt               | THL Biobank / Finnish Institute for Health and Welfare (THL), Helsinki, Finland                                                                                       | minna.brunfeldt@thl.fi                | FinnGen Teams | Registry Data Operations            |
| Hannele Mattsson              | THL Biobank / Finnish Institute for Health and Welfare (THL), Helsinki, Finland                                                                                       | hannele.mattsson@thl.fi               | FinnGen Teams | Registry Data Operations            |
| Kati Kristiansson             | THL Biobank / Finnish Institute for Health and Welfare (THL), Helsinki, Finland                                                                                       | kati.kristiansson@thl.fi              | FinnGen Teams | Registry Data Operations            |
| Susanna Lemmela               | Institute for Molecular Medicine Finland (FIMM), HiLIFE, University of Helsinki, Helsinki, Finland                                                                    | susanna.lemmela@helsinki.fi           | FinnGen Teams | Registry Data Operations            |
| Sami Koskelainen              | THL Biobank / Finnish Institute for Health and Welfare (THL), Helsinki, Finland                                                                                       | sami.koskelainen@thl.fi               | FinnGen Teams | Registry Data Operations            |
| Tero Hiekkalinna              | THL Biobank / Finnish Institute for Health and Welfare (THL), Helsinki, Finland                                                                                       | tero.hiekkalinna@helsinki.fi          | FinnGen Teams | Registry Data Operations            |
| Teemu Paajanen                | THL Biobank / Finnish Institute for Health and Welfare (THL), Helsinki, Finland                                                                                       | teemu.paajanen@thl.fi                 | FinnGen Teams | Registry Data Operations            |
| Priit Palta                   | Institute for Molecular Medicine Finland (FIMM), HiLIFE, University of Helsinki, Helsinki, Finland                                                                    | priit.palta@helsinki.fi               | FinnGen Teams | Sequencing Informatics              |
| Kalle Päm                     | Institute for Molecular Medicine Finland (FIMM), HiLIFE, University of Helsinki, Helsinki, Finland                                                                    | kalle.pam@helsinki.fi                 | FinnGen Teams | Sequencing Informatics              |
| Mart Kals                     | Institute for Molecular Medicine Finland (FIMM), HiLIFE, University of Helsinki, Helsinki, Finland                                                                    | mart.kals@helsinki.fi                 | FinnGen Teams | Sequencing Informatics              |
| Shuang Luo                    | Institute for Molecular Medicine Finland (FIMM), HiLIFE, University of Helsinki, Helsinki, Finland                                                                    | shuang.luo@helsinki.fi                | FinnGen Teams | Sequencing Informatics              |
| Tarja Laitinen                | Pirkanmaa Hospital District, Tampere, Finland                                                                                                                         | tarja.laitinen@pshp.fi                | FinnGen Teams | Trajectory                          |
| Mary Pat Reeve                | Institute for Molecular Medicine Finland (FIMM), HiLIFE, University of Helsinki, Helsinki, Finland                                                                    | mary.reeve@helsinki.fi                | FinnGen Teams | Trajectory                          |
| Shanmukha Sampath Padmanabhan | Institute for Molecular Medicine Finland (FIMM), HiLIFE, University of Helsinki, Helsinki, Finland                                                                    | sam.padmanabhan@helsinki.fi           | FinnGen Teams | Trajectory                          |
| Marianna Niemi                | University of Tampere, Tampere, Finland                                                                                                                               | marianne.niemi@tuni.fi                | FinnGen Teams | Trajectory                          |
| Hani Siirtola                 | University of Tampere, Tampere, Finland                                                                                                                               | hani.siirtola@tuni.fi                 | FinnGen Teams | Trajectory                          |
| Javier Gracia-Tabuenca        | University of Tampere, Tampere, Finland                                                                                                                               | javier.graciatabuenca@tuni.fi         | FinnGen Teams | Trajectory                          |
| Mika Helminen                 | University of Tampere, Tampere, Finland                                                                                                                               | mika.helminen@tuni.fi                 | FinnGen Teams | Trajectory                          |
| Tiina Luukkaala               | University of Tampere, Tampere, Finland                                                                                                                               | tiina.luukkaala@tuni.fi               | FinnGen Teams | Trajectory                          |
| Iida Vähätalo                 | University of Tampere, Tampere, Finland                                                                                                                               | iida.vahatalo@epshp.fi                | FinnGen Teams | Trajectory                          |
| Jyrki Pitkanen                | Institute for Molecular Medicine Finland (FIMM), HiLIFE, University of Helsinki, Helsinki, Finland                                                                    | jyrki.pitkanen@helsinki.fi            | FinnGen Teams | Data protection officer             |
| Marco Hautalahti              | Finnish Biobank Cooperative - FINBB                                                                                                                                   | marco.hautalahti@finbb.fi             | FinnGen Teams | FINBB - Finnish biobank cooperative |
| Johanna Mäkelä                | Finnish Biobank Cooperative - FINBB                                                                                                                                   | johanna.makela@finbb.fi               | FinnGen Teams | FINBB - Finnish biobank cooperative |
| Sarah Smith                   | Finnish Biobank Cooperative - FINBB                                                                                                                                   | sarah.smith@finbb.fi                  | FinnGen Teams | FINBB - Finnish biobank cooperative |
| Tom Southerington             | Finnish Biobank Cooperative - FINBB                                                                                                                                   | tom.southerington@finbb.fi            | FinnGen Teams | FINBB - Finnish biobank cooperative |
